# Supplementary material for: Effect of felzartamab anti-CD38 treatment on the molecular phenotype of antibody-mediated rejection in kidney transplant biopsies.
Source: Research Square preprint supplement (doi:10.21203/rs.3.rs-4870641/v1), 2024-08-16
Supplement: Supplementary file 1 [file 3db4863c42baa56bc37621b2.docx]

| **Table 1. Effect of felzartamab on molecular scoresa,b** | | | | | | | | | | | | | |
| --- | --- | --- | --- | --- | --- | --- | --- | --- | --- | --- | --- | --- | --- |
| **Annotation** | **Score** | **Baseline – Week 24** | | | | **Week24 – Week 52** | | | | **Baseline – Week 52** | | | |
| **Δ Placebo (N=10)** | **Δ Felzartamab (N=10)** | **ΔΔ** | **ΔΔ FDR** | **Δ Placebo (N=10)** | **Δ Felzartamab (N=10)** | **ΔΔ** | **ΔΔ FDR** | **Δ Placebo (N=10)** | **Δ Felzartamab (N=10)** | **ΔΔ** | **ΔΔ FDR** |
| **cfDNA** | Donor-derived cell-free DNA (dd-cfDNA, cp/mL) | **0.50 (76.12)** | **-55.00 (30)** | **-55.50 (53.06)** | **2e-04** | **-3.50 (69.12)** | **14.50 (25.5)** | **18.00 (47.31)** | **0.027** | **-3.00 (51)** | **-40.50 (45.75)** | **-37.50 (48.38)** | **0.045** |
| **ABMR-related** | ABMR classifier (ABMRProb) | **0.10 (0.37)** | **-0.57 (0.33)** | **-0.67 (0.35)** | **1e-03** | **-0.26 (0.44)** | **0.54 (0.45)** | **0.79 (0.45)** | **1e-03** | -0.15 (0.43) | -0.03 (0.42) | 0.12 (0.43) | 0.709 |
| Glomerulitis classifier (g>0Prob) | **-0.02 (0.23)** | **-0.31 (0.35)** | **-0.29 (0.29)** | **3e-03** | **-0.19 (0.34)** | **0.31 (0.41)** | **0.50 (0.37)** | **2e-04** | -0.22 (0.3) | 0.00 (0.38) | 0.21 (0.34) | 0.277 |
| Peritubular capillaritis classifier (ptc>0Prob) | **-0.12 (0.25)** | **-0.55 (0.27)** | **-0.43 (0.26)** | **3e-03** | **-0.10 (0.37)** | **0.37 (0.31)** | **0.47 (0.34)** | **3e-03** | -0.22 (0.3) | -0.18 (0.35) | 0.04 (0.33) | 0.977 |
| DSA-selective transcripts (DSAST) | **-0.09 (0.22)** | **-0.37 (0.24)** | **-0.28 (0.23)** | **0.026** | **-0.16 (0.32)** | **0.16 (0.33)** | **0.32 (0.33)** | **0.026** | -0.24 (0.33) | -0.20 (0.25) | 0.04 (0.29) | 0.988 |
| NK cell burden (NKB) | **0.02 (0.22)** | **-0.78 (0.49)** | **-0.80 (0.36)** | **0.014** | **-0.19 (0.4)** | **0.68 (0.59)** | **0.87 (0.49)** | **0.014** | -0.17 (0.46) | -0.10 (0.62) | 0.07 (0.54) | 0.972 |
| **TCMR-related** | TCMR classifier (TCMRProb) | -0.01 (0.02) | 0.00 (0) | 0.01 (0.01) | 0.358 | 0.00 (0.02) | 0.00 (0) | 0.00 (0.01) | 0.856 | -0.01 (0.02) | 0.00 (0) | 0.01 (0.01) | 0.358 |
| Tubulitis classifier (t>1Prob) | -0.01 (0.06) | -0.02 (0.04) | -0.01 (0.05) | 1.000 | 0.00 (0.04) | 0.01 (0.02) | 0.01 (0.03) | 1.000 | -0.01 (0.05) | -0.01 (0.03) | -0.01 (0.04) | 1.000 |
| Interstitial infiltrate classifier (i>1Prob) | -0.01 (0.04) | -0.02 (0.03) | -0.01 (0.04) | 0.964 | 0.01 (0.04) | 0.01 (0.04) | 0.00 (0.04) | 0.964 | 0.00 (0.05) | -0.01 (0.06) | -0.01 (0.05) | 0.964 |
| Cytotoxic T cell-associated (QCAT) | -0.20 (0.41) | -0.70 (0.46) | -0.50 (0.43) | 0.425 | 0.10 (0.33) | 0.54 (0.57) | 0.44 (0.45) | 0.425 | -0.10 (0.46) | -0.16 (0.41) | -0.06 (0.44) | 0.871 |
| T cell burden (TCB) | -0.44 (0.71) | -0.79 (0.56) | -0.36 (0.64) | 0.825 | 0.28 (0.57) | 0.34 (0.6) | 0.06 (0.58) | 0.905 | -0.16 (0.88) | -0.45 (0.43) | -0.29 (0.65) | 0.825 |
| **macrophage-related** | Alternatively activated macrophage (AMAT1) | 0.08 (0.2) | -0.27 (0.45) | -0.35 (0.33) | 0.128 | 0.09 (0.23) | 0.11 (0.47) | 0.02 (0.35) | 0.812 | 0.18 (0.19) | -0.16 (0.32) | -0.33 (0.25) | 0.128 |
| Constitutive macrophage (QCMAT) | 0.00 (0.15) | -0.24 (0.27) | -0.24 (0.21) | 0.340 | 0.01 (0.12) | 0.09 (0.27) | 0.08 (0.2) | 0.685 | 0.01 (0.11) | -0.15 (0.24) | -0.16 (0.18) | 0.348 |
| **Atrophy-fibrosis -related** | Fibrosis classifier (ci>1Prob) | -0.02 (0.29) | 0.13 (0.32) | 0.15 (0.3) | 0.434 | 0.06 (0.25) | -0.08 (0.53) | -0.14 (0.39) | 0.844 | 0.04 (0.25) | 0.05 (0.37) | 0.01 (0.31) | 0.434 |
| Atrophy classifier (ct>1Prob) | 0.01 (0.33) | 0.12 (0.31) | 0.12 (0.32) | 0.587 | 0.09 (0.27) | -0.06 (0.44) | -0.15 (0.36) | 0.587 | 0.10 (0.32) | 0.07 (0.41) | -0.03 (0.36) | 0.587 |
| **parenchyma-related** | Kidney parenchymal no solute carriers (KT1) | -0.05 (0.22) | -0.15 (0.23) | -0.09 (0.22) | 0.731 | -0.01 (0.11) | 0.10 (0.22) | 0.11 (0.17) | 0.705 | -0.06 (0.25) | -0.04 (0.18) | 0.02 (0.22) | 0.705 |
| Kindey parenchymal solute carriers (KT2) | -0.09 (0.39) | -0.16 (0.37) | -0.07 (0.38) | 0.577 | -0.09 (0.2) | 0.14 (0.38) | 0.23 (0.29) | 0.484 | -0.18 (0.42) | -0.02 (0.31) | 0.16 (0.37) | 0.577 |
| a all scores are reported as median (interquartile range - IQR)  bOmnibus PERMANOVA results by annotation across all time periods: PABMR-related =0.049, PTCMR-related = 0.89, Pmacrophage-related = 0.25, Patrophy-fibrosis-related = 0.73, Pparenchyma-related = 0.32  Bold denotes ANOVA interactive effect FDR < 0.05 FDR correction was carried out within each annotation grouping  Abbreviations: donor-derived cell-free DNA (dd-cfDNA); antibody-mediated rejection (ABMR); T cell mediated rejection (TCMR) | | | | | | | | | | | | | |
