# Supplementary material for: Effect of felzartamab anti-CD38 treatment on the molecular phenotype of antibody-mediated rejection in kidney transplant biopsies.
Source: Research Square preprint supplement (doi:10.21203/rs.3.rs-4870641/v1), 2024-08-16
Supplement: Supplementary file 2 [file eb7623feb229455ca45bb54c.pdf]

1  
2  
3  
4  
5  
6

Supplementary Information for  
Effect of felzartamab anti-CD38 treatment on the molecular phenotype of  
antibody-mediated rejection in kidney transplant biopsies.

|    |                                                                                                                    |    |
|----|--------------------------------------------------------------------------------------------------------------------|----|
| 7  | <b>Table of Contents</b>                                                                                           |    |
| 8  | Figure S1.....                                                                                                     | 3  |
| 9  | Supplementary Table 1. Demographic and characteristics of the participants at baseline.....                        | 4  |
| 10 | Supplementary Table 2. Comparing MMDx diagnosis with histology diagnosis and lesions in patients who               |    |
| 11 | received felzartamab.....                                                                                          | 5  |
| 12 | Supplementary Table 3. Molecular scores (PBTs, classifiers).....                                                   | 6  |
| 13 | Supplementary Table 4. Median (IQR) molecular scores in baseline biopsies from felzartamab-treated vs              |    |
| 14 | placebo-treated patients.....                                                                                      | 7  |
| 15 | Supplementary Table 6. Top 20 differentially expressed genes between baseline and week24 in biopsies               |    |
| 16 | from placebo and felzartamab treated patients sorted by treatment effect (selected by $\Delta\Delta$ p, sorted by  |    |
| 17 | $\Delta\Delta\logFC$ ).....                                                                                        | 9  |
| 18 | Supplementary Table 7. Functional enrichment analysis of genes affects by felzartamab treatment                    |    |
| 19 | between baseline and week 24 (by FDR).....                                                                         | 10 |
| 20 | Supplementary Table 8. Effect of treatment on interferon gamma-inducible antibody-mediated rejection               |    |
| 21 | activity genes (IIAAG).....                                                                                        | 11 |
| 22 | Supplementary Table 9. Effect of treatment on natural killer (NK) cell-expressed antibody-mediated                 |    |
| 23 | rejection activity genes (NKAAG).....                                                                              | 12 |
| 24 | Supplementary Table 10. Effect of treatment on antibody-mediated rejection-associated endothelial genes            |    |
| 25 | (AEG).....                                                                                                         | 13 |
| 26 | Supplementary Table 11. Top 20 genes increased by felzartamab between baseline and week 24 (by P-                  |    |
| 27 | value).....                                                                                                        | 14 |
| 28 | Supplementary Table 12A. Top 20 differentially expressed genes between baseline and week 52 in                     |    |
| 29 | biopsies from placebo and felzartamab treated patients (selected by P-value, sorted by $\Delta\Delta\logFC$ )..... | 15 |
| 30 | Supplementary Table 12B. Top Hinze-defined injury genes differentially-expressed between baseline and              |    |
| 31 | week52 biopsies from placebo and felzartamab treated patients (by P-value).....                                    | 16 |
| 32 | Supplementary Table 13. Functional enrichment analysis of genes affected by felzartamab treatment                  |    |
| 33 | between baseline and week 52 (by FDR).....                                                                         | 17 |
| 34 | Supplementary Table 14. Definition of ABMR activity genes.....                                                     | 18 |
| 35 | Supplementary Table 15. IFNG-inducible ABMR activity genes.....                                                    | 19 |
| 36 | Supplementary Table 16. Definition of NK cell-expressed ABMR activity genes.....                                   | 20 |
| 37 | Supplementary Table 17. ABMR-associated endothelial genes.....                                                     | 21 |
| 38 |                                                                                                                    |    |
| 39 |                                                                                                                    |    |
| 40 |                                                                                                                    |    |

## Individual patient response

Worsened  Improved

$\Delta\Delta$  Baseline - Week 24 = -55.5 | FDR = 2e-04  
 $\Delta\Delta$  Week 24 - Week 52 = 18 | FDR = 0.027  
 $\Delta\Delta$  Baseline - Week 52 = -37.5 | FDR = 0.045

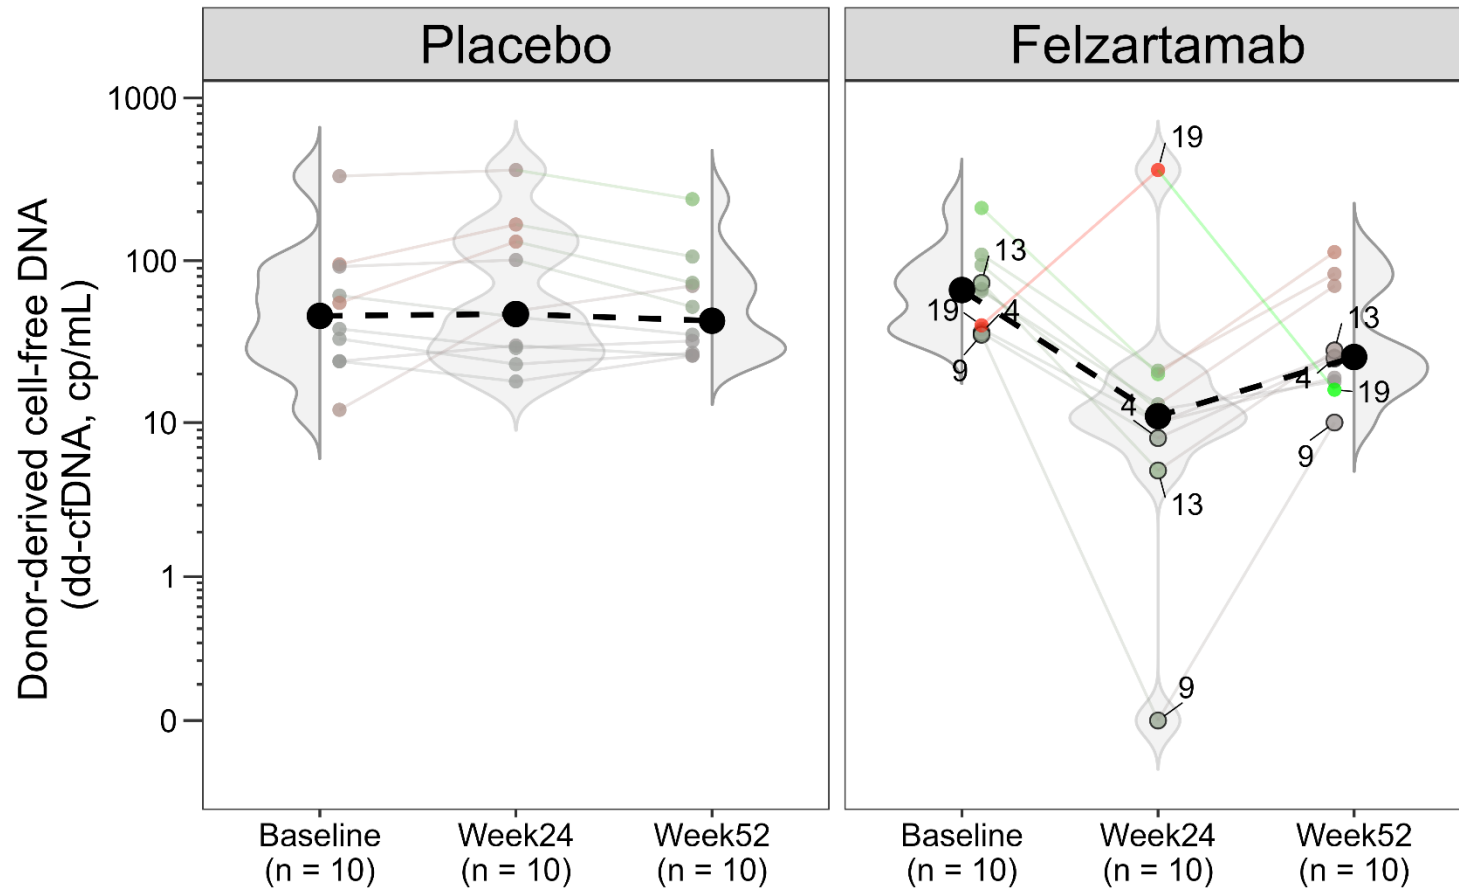

41

42 **Figure S1.** Effect of felzartamab treatment on donor-derived cell-free DNA (A) Shaded regions represent density estimates by group. Solid black  
 43 circles represent the median scores within group. Dashed lines illustrate the changes in median scores ( $\Delta$ ) from baseline to week 24 to week 52  
 44 within treatment groups. Solid colored circles represent individual patient scores. Numbers identify patients of interest. Solid colored lines illustrate  
 45 the change in individual patient scores from baseline to week 24 to week 52.

**Supplementary Table 1. Demographic and characteristics of the participants at baseline**

| Variables                                                                                                                                                                                                                                    | Placebo<br>(n=10)  | Felzartamab<br>(n=10) | All patients<br>(N=20) |
|----------------------------------------------------------------------------------------------------------------------------------------------------------------------------------------------------------------------------------------------|--------------------|-----------------------|------------------------|
| <b>Recorded at transplantation</b>                                                                                                                                                                                                           |                    |                       |                        |
| Female sex – no. (%)                                                                                                                                                                                                                         | 7 (70.0)           | 3 (30.0)              | 10 (50.0)              |
| Median recipient age (IQR) – yr                                                                                                                                                                                                              | 50 (17-59)         | 34 (5-58)             | 41 (5-59)              |
| Mean recipient age (SD) - yr                                                                                                                                                                                                                 | 45 (13)            | 35 (15)               | 40 (14)                |
| Living donor – no. (%)                                                                                                                                                                                                                       | 2 (20.0)           | 3 (30.0)              | 5 (25.0)               |
| Median donor age (range) – yr                                                                                                                                                                                                                | 36 (3-63)          | 48 (18-55)            | 43 (3-63)              |
| Mean donor age (SD) – yr                                                                                                                                                                                                                     | 37 (18)            | 42 (14)               | 39 (16)                |
| Median HLA (A, B, DR) mismatch (IQR)                                                                                                                                                                                                         | 3 (2 to 3)         | 2 (2 to 4)            | 3 (2 to 3)             |
| <b>Recorded at trial inclusion</b>                                                                                                                                                                                                           |                    |                       |                        |
| Median age of study patients (range) – yr                                                                                                                                                                                                    | 58 (36-74)         | 44 (31-65)            | 53 (31-74)             |
| Mean age of study patients (SD) – yr                                                                                                                                                                                                         | 57 (11)            | 45 (11)               | 51 (12)                |
| Median time to inclusion in the trial (IQR) – yr                                                                                                                                                                                             | 11 (6 to 19)       | 8 (5 to 11)           | 9 (5 to 19)            |
| Median eGFR (IQR) – mL/min/1.73 m <sup>2</sup>                                                                                                                                                                                               | 36 (33 to 46)      | 63 (34 to 70)         | 37 (33 to 66)          |
| Mean eGFR (SD) – mL/min/1.73 m <sup>2</sup>                                                                                                                                                                                                  | 42 (19)            | 54 (20)               | 48 (20)                |
| Median protein/creatinine ratio (IQR) – mg/g                                                                                                                                                                                                 | 1227 (178 to 1475) | 830 (421 to 1364)     | 993 (196 to 1489)      |
| Mean protein/creatinine ratio (SD) – mg/g                                                                                                                                                                                                    | 1101 (1081)        | 1414 (1686)           | 1257 (1387)            |
| <b>Banff 2019 ABMR phenotypes (baseline biopsies) – no. (%)</b>                                                                                                                                                                              |                    |                       |                        |
| Active ABMR                                                                                                                                                                                                                                  | 3 (30.0)           | 4 (40.0)              | 7 (35.0)               |
| Chronic active ABMR                                                                                                                                                                                                                          | 7 (70.0)           | 6 (60.0)              | 13 (65.0)              |
| Additional borderline lesion                                                                                                                                                                                                                 | 2 (20.0)           | 0 (0.0)               | 2 (10.0)               |
| <b>MMDx signouts – no. (%)</b>                                                                                                                                                                                                               |                    |                       |                        |
| Moderate to severe early-stage ABMR                                                                                                                                                                                                          | 1 (10.0)           | 1 (10.0)              | 2 (10.0)               |
| Severe early-stage ABMR                                                                                                                                                                                                                      | 1 (10.0)           | 1 (10.0)              | 2 (10.0)               |
| Moderate fully-developed ABMR                                                                                                                                                                                                                | 2 (20.0)           | 2 (20.0)              | 4 (20.0)               |
| Severe fully-developed ABMR                                                                                                                                                                                                                  | 4 (40.0)           | 4 (40.0)              | 8 (40.0)               |
| Late-stage ABMR                                                                                                                                                                                                                              | 1 (10.0)           | 2 (20.0)              | 3 (15.0)               |
| Mixed rejection                                                                                                                                                                                                                              | 1 (10.0)           | 0 (0.0)               | 1 (5.0)                |
| <b>DSA characteristics (screening visit)</b>                                                                                                                                                                                                 |                    |                       |                        |
| HLA class I DSA only – no. (%)                                                                                                                                                                                                               | 3 (30.0)           | 4 (40.0)              | 7 (35.0)               |
| HLA class II DSA only – no. (%)                                                                                                                                                                                                              | 6 (60.0)           | 5 (50.0)              | 11 (55.0)              |
| HLA class I and II DSA – no. (%)                                                                                                                                                                                                             | 1 (10.0)           | 1 (10.0)              | 2 (10.0)               |
| Anti-DQ DSA – no. (%)                                                                                                                                                                                                                        | 5 (50.0)           | 5 (50.0)              | 10 (50.0)              |
| Peak MFI of DSA >10,000 – no. (%)                                                                                                                                                                                                            | 3 (30.0)           | 4 (40.0)              | 7 (35.0)               |
| Median DSA (IQR) – n                                                                                                                                                                                                                         | 2 (1 to 3)         | 2 (1 to 3)            | 2 (1 to 3)             |
| Abbreviations: ABMR, antibody-mediated rejection; DSA, donor-specific antibody; eGFR, estimated glomerular filtration rate; HLA, human leukocyte antigen; IQR, interquartile range; MFI, mean fluorescence intensity; SD, standard deviation |                    |                       |                        |

**Supplementary Table 2. Comparing MMDx diagnosis with histology diagnosis and lesions in patients who received felzartamab**

| Patient | Baseline biopsy     |           |                      |      |                        |                      | Week 24 biopsy<br>(end of felzartamab treatment) |           |                      |      |                          |                      | Week 52 biopsy<br>(28 weeks after felzartamab treatment) |           |                      |      |                          |                      | comments                                        |
|---------|---------------------|-----------|----------------------|------|------------------------|----------------------|--------------------------------------------------|-----------|----------------------|------|--------------------------|----------------------|----------------------------------------------------------|-----------|----------------------|------|--------------------------|----------------------|-------------------------------------------------|
|         | MMDx 1208           | ptc>0/g>0 | ABMR <sub>Prob</sub> | NKB  | ABMR Phenotype Banff19 | Lesions ptc/g/MVI/cg | MMDx 1208                                        | ptc>0/g>0 | ABMR <sub>Prob</sub> | NKB  | ABMR phenotype Banff19   | Lesions ptc/g/MVI/cg | MMDx 1208                                                | ptc>0/g>0 | ABMR <sub>Prob</sub> | NKB  | ABMR phenotype Banff19   | Lesions ptc/g/MVI/cg |                                                 |
| 2       | Severe FABMR        | 0.89/0.89 | 0.86                 | 1.9  | C4d-neg caABMR         | 2/3/5/3              | Moderate FABMR (Rej score is normal)             | 0.36/0.59 | 0.66                 | 1.0  | C4d-neg cABMR (inactive) | 0/0/0/1              | Severe FABMR                                             | 0.85/0.92 | 0.83                 | 1.46 | C4d-neg caABMR           | 2/1/3/1              |                                                 |
| 4       | FABMR (99% medulla) | 0.57/0.53 | 0.58                 | 0.91 | C4d-pos caABMR         | 1/1/2/?              | Late ABMR (mild) (90% medulla)                   | 0.31/0.44 | 0.17                 | 0.71 | C4d-neg cABMR (inactive) | 0/1/1/3              | Late ABMR (minimal)                                      | 0.37/0.39 | 0.17                 | 0.57 | C4d-neg cABMR (inactive) | 0/1/1/1              | No recurrence and no recovery of blood NK cells |
| 5       | Severe FABMR        | 0.79/0.82 | 0.84                 | 1.34 | C4d-neg aABMR          | 2/1/3/0              | Moderate EABMR                                   | 0.65/0.62 | 0.50                 | 0.95 | No ABMR                  | 0/0/0/0              | Moderate EABMR                                           | 0.59/0.73 | 0.64                 | 1.0  | C4d-neg aABMR            | 1/1/2/0              |                                                 |
| 7       | FABMR (92% medulla) | 0.72/0.60 | 0.80                 | 1.44 | C4d-neg caABMR         | 0/3/3/2              | NR                                               | 0.16/0.21 | 0.11                 | 0.50 | C4d-pos caABMR           | 0/1/1/3              | Moderate/Severe FABMR                                    | 0.71/0.59 | 0.77                 | 1.22 | C4d-pos caABMR           | 0/2/2/2              |                                                 |
| 9       | LABMR (minimal)     | 0.25/0.27 | 0.18                 | 0.50 | C4d-neg caABMR         | 0/2/2/1              | NR (LABMR+cg score)                              | 0.12/0.24 | 0.16                 | 0.22 | C4d-neg cABMR (inactive) | 0/1/1/2              | NR                                                       | 0.20/0.27 | 0.14                 | 0.28 | C4d-neg cABMR (inactive) | 0/0/0/0              | Minimal activity or recurrence                  |
| 12      | FABMR (99% medulla) | 0.53/0.59 | 0.68                 | 0.94 | C4d-pos caABMR         | 1/1/2/1              | NR (99% medulla)                                 | 0.07/0.11 | 0.09                 | 0.50 | C4d-neg cABMR (inactive) | 0/0/0/0              | Possible ABMR (Rej score is normal)                      | 0.20/0.36 | 0.23                 | 0.66 | C4d-neg cABMR (inactive) | 0/0/0/1              |                                                 |
| 13      | Severe EABMR        | 0.87/0.89 | 0.90                 | 1.20 | C4d-pos aABMR          | 2/2/4/0              | Moderate EABMR                                   | 0.75/0.59 | 0.56                 | 1.32 | C4d-pos aABMR            | 2/0/2/0              | Severe FABMR                                             | 0.85/0.86 | 0.91                 | 1.47 | C4d-pos caABMR           | 1/1/2/1              | Minimal effect of FLZ                           |
| 16      | Severe FABMR        | 0.89/0.88 | 0.80                 | 1.67 | C4d-pos aABMR          | 2/2/4/0              | Mild ABMR (Rej score is normal) (99% medulla)    | 0.23/0.44 | 0.32                 | 0.46 | No ABMR                  | 0/0/0/0              | Severe EABMR                                             | 0.81/0.86 | 0.83                 | 1.73 | C4d-neg aABMR            | 2/0/2/0              |                                                 |
| 19      | LABMR (mild)        | 0.50/0.44 | 0.36                 | 0.91 | C4d-neg caABMR         | 2/1/3/3              | NR (50% medulla)                                 | 0.16/0.12 | 0.02                 | 0.28 | C4d-pos cABMR (inactive) | 0/0/0/1              | Moderate/Severe FABMR                                    | 0.40/0.71 | 0.80                 | 2.44 | C4d-neg cABMR (inactive) | 0/0/0/2              |                                                 |
| 22      | EABMR               | 0.76/0.71 | 0.50                 | 1.44 | C4d-pos aABMR          | 2/1/3/0              | NR                                               | 0.09/0.15 | 0.08                 | 0.42 | No ABMR                  | 0/0/0/0              | Mild EABMR                                               | 0.53/0.41 | 0.43                 | 1.12 | No ABMR                  | 0/0/0/0              |                                                 |

Abbreviations: aABMR, active ABMR; ABMR, antibody-mediated rejection; ABMR<sub>Prob</sub>, probability of ABMR; C4d-neg, C4d-negative; C4d-pos, C4d-positive; caABMR, chronic active ABMR; cABMR, chronic ABMR; cg, glomerular double contours; EABMR, early-stage ABMR; FABMR, fully-developed ABMR; g, glomerulitis; LABMR, late-stage ABMR; MMDx, Molecular Microscope® Diagnostic System; MVI, microvascular inflammation; NKB, natural killer-like B cells; NR, no rejection; ptc, peritubular capillaritis; Rej, rejection;

**Supplementary Table 3. Molecular scores (PBTs, classifiers)**

| Category                 | Abbreviation          | Description                                                                                          |
|--------------------------|-----------------------|------------------------------------------------------------------------------------------------------|
| TCMR-related             | TCMR-RAT              | TCMR-associated <sup>1</sup>                                                                         |
|                          | QCAT                  | Cytotoxic T cell associated <sup>2</sup>                                                             |
|                          | TCB                   | T-cell burden related <sup>3</sup>                                                                   |
|                          | i>1 <sub>Prob</sub>   | Top 20 transcripts in classifier of probability of histologic kidney i-lesion score > 1 <sup>4</sup> |
|                          | t>1 <sub>Prob</sub>   | Top 20 transcripts in classifier of probability of histologic kidney t-lesion score > 1 <sup>4</sup> |
|                          | TCMR <sub>Prob</sub>  | Top 20 transcripts in classifier of probability of histologic kidney TCMR diagnosis <sup>4</sup>     |
| ABMR-related             | NKB                   | Natural killer (NK) cell burden <sup>5</sup> (only valid if there is no TCMR)                        |
|                          | DSAST                 | Kidney derived DSA selective transcripts <sup>3</sup>                                                |
|                          | ABMR <sub>Prob</sub>  | Top 20 transcripts in classifier of probability of histologic kidney ABMR diagnosis <sup>4</sup>     |
|                          | g>0 <sub>Prob</sub>   | Top 20 transcripts in classifier of probability of histologic g-lesion score > 0 <sup>4</sup>        |
|                          | ptc>0 <sub>Prob</sub> | Top 20 transcripts in classifier of probability of histologic ptc-lesion score > 0 <sup>4</sup>      |
| New ABMR-related PBTs    | AAG                   | ABMR-associated activity genes                                                                       |
|                          | IIAAG                 | IFNG-inducible ABMR-associated activity genes                                                        |
|                          | NKAAG                 | NK cell expressed ABMR-associated activity genes                                                     |
|                          | AEG                   | ABMR-associated endothelial cell genes                                                               |
| Macrophage-related       | AMAT1                 | Alternatively activated macrophage transcripts <sup>6</sup>                                          |
|                          | QCMAT                 | Constitutive macrophage transcripts <sup>7</sup>                                                     |
| Recent injury-related    | IRITD3                | Injury-repair induced, day 3 (IRITD3) <sup>8</sup>                                                   |
|                          | IRITD5                | Injury-repair induced, day 5 (IRITD3) <sup>8</sup>                                                   |
|                          | IRRAT30               | Injury-repair associated (IRRAT30) <sup>9</sup>                                                      |
| Atrophy-fibrosis-related | ci>1 <sub>Prob</sub>  | Fibrosis classifier <sup>10</sup>                                                                    |
|                          | ct>1 <sub>Prob</sub>  | Atrophy classifier <sup>10</sup>                                                                     |
| Normal parenchyma        | KT1                   | Normal kidney transcripts (except solute carriers) <sup>11</sup>                                     |
|                          | KT2                   | Normal kidney solute carrier transcripts <sup>11</sup>                                               |

<sup>A</sup> <https://www.ualberta.ca/medicine/institutes-centres-groups/atagc/research/gene-lists>.

**Reference List**

- Halloran, P.F., Venner, J.M. & Famulski, K.S. Comprehensive Analysis of Transcript Changes Associated With Allograft Rejection: Combining Universal and Selective Features. *Am J Transplant* **17**, 1754-1769 (2017).
- Hidalgo, L.G., et al. The transcriptome of human cytotoxic T cells: measuring the burden of CTL-associated transcripts in human kidney transplants. *Am J Transplant* **8**, 637-646 (2008).
- Hidalgo, L.G., et al. NK cell transcripts and NK cells in kidney biopsies from patients with donor-specific antibodies: evidence for NK cell involvement in antibody-mediated rejection. *Am J Transplant* **10**, 1812-1822 (2010).
- Reeve, J., et al. Assessing rejection-related disease in kidney transplant biopsies based on archetypal analysis of molecular phenotypes. *Jci Insight* **2**, e94197 (2017).
- Hidalgo, L.G., et al. Interpreting NK cell transcripts versus T cell transcripts in renal transplant biopsies. *Am J Transplant* **12**, 1180-1191 (2012).
- Famulski, K.S., Sis, B., Billesberger, L. & Halloran, P.F. Interferon-gamma and donor MHC class I control alternative macrophage activation and activin expression in rejecting kidney allografts: a shift in the Th1-Th2 paradigm. *Am J Transplant* **8**, 547-556 (2008).
- Famulski, K.S., et al. Defining the canonical form of T-cell-mediated rejection in human kidney transplants. *Am J Transplant* **10**, 810-820 (2010).
- Famulski, K.S., et al. Transcriptome analysis reveals heterogeneity in the injury response of kidney transplants. *Am J Transplant* **7**, 2483-2495 (2007).
- Famulski, K.S., et al. Molecular phenotypes of acute kidney injury in kidney transplants. *J Am Soc Nephrol* **23**, 948-958 (2012).
- Halloran, P.F., et al. Molecular phenotype of kidney transplant indication biopsies with inflammation in scarred areas. *Am J Transplant* **19**, 1356-1370 (2019).
- Einecke, G., Broderick, G., Sis, B. & Halloran, P.F. Early loss of renal transcripts in kidney allografts: relationship to the development of histologic lesions and alloimmune effector mechanisms. *Am J Transplant* **7**, 1121-1130 (2007).

Abbreviations: pathogenesis-based transcript set (PBT); donor-derived cell-free DNA (dd-cfDNA); antibody-mediated rejection (ABMR); T cell mediated rejection (TCMR)

48

49

**Supplementary Table 4. Median (IQR) molecular scores in baseline biopsies from felzartamab-treated vs placebo-treated patients**

| Annotation         | Score                                                    | Placebo (N=10) | Felzartamab (N=10) | p     | FDR*  |
|--------------------|----------------------------------------------------------|----------------|--------------------|-------|-------|
| cfDNA              | Donor-derived cell-free DNA (dd-cfDNA, cp/mL)            | 46.50 (58)     | 66.00 (50.25)      | 0.284 | 0.560 |
|                    | Donor-derived cell-free DNA (dd-cfDNA, %)                | 0.83 (0.88)    | 1.01 (1.42)        | 0.560 | 0.560 |
| ABMR-related       | ABMR classifier ( $ABMR_{Prob}$ )                        | 0.67 (0.36)    | 0.74 (0.31)        | 0.942 | 1.000 |
|                    | Glomerulitis classifier ( $g > 0_{Prob}$ )               | 0.76 (0.2)     | 0.65 (0.32)        | 0.511 | 1.000 |
|                    | Peritubular capillaritis classifier ( $ptc > 0_{Prob}$ ) | 0.81 (0.18)    | 0.74 (0.31)        | 0.744 | 1.000 |
|                    | DSA-selective transcripts (DSAST)                        | 0.65 (0.24)    | 0.64 (0.16)        | 0.689 | 1.000 |
|                    | NK cell burden (NKB)                                     | 1.17 (0.29)    | 1.27 (0.53)        | 1.000 | 1.000 |
| TCMR-related       | TCMR classifier ( $TCMR_{Prob}$ )                        | 0.02 (0.03)    | 0.01 (0.01)        | 0.251 | 0.581 |
|                    | Tubulitis classifier ( $t > 1_{Prob}$ )                  | 0.06 (0.07)    | 0.05 (0.05)        | 0.302 | 0.581 |
|                    | Interstitial infiltrate classifier ( $i > 1_{Prob}$ )    | 0.06 (0.05)    | 0.05 (0.05)        | 0.585 | 0.585 |
|                    | Cytotoxic T cell-associated (QCAT)                       | 1.37 (0.54)    | 1.25 (0.31)        | 0.379 | 0.581 |
|                    | T cell burden (TCB)                                      | 1.88 (1.02)    | 1.71 (0.39)        | 0.465 | 0.581 |
| Macrophage-related | Alternatively activated macrophage (AMAT1)               | 0.57 (0.16)    | 0.71 (0.3)         | 0.320 | 0.641 |
|                    | Constitutive macrophage (QCMAT)                          | 0.51 (0.14)    | 0.52 (0.24)        | 0.828 | 0.828 |
| Injury-related     | Injury-repair associated (IRRAT30)                       | 0.27 (0.46)    | 0.03 (0.17)        | 0.268 | 0.447 |
|                    | Injury-repair induced, day 3 (IRITD3)                    | 0.08 (0.19)    | 0.00 (0.08)        | 0.662 | 0.828 |
|                    | Injury-repair induced, day 5 (IRITD5)                    | 0.37 (0.14)    | 0.33 (0.11)        | 1.000 | 1.000 |
|                    | Fibrosis classifier ( $ci > 1_{Prob}$ )                  | 0.67 (0.29)    | 0.36 (0.15)        | 0.019 | 0.093 |
|                    | Atrophy classifier ( $ct > 1_{Prob}$ )                   | 0.53 (0.39)    | 0.24 (0.28)        | 0.056 | 0.140 |
| Parenchyma-related | Kidney parenchymal (KT1)                                 | -0.17 (0.37)   | -0.10 (0.18)       | 0.511 | 0.689 |
|                    | Kidney parenchymal - no solute carriers (KT2)            | -0.21 (0.61)   | -0.19 (0.3)        | 0.689 | 0.689 |

FDR correction was carried out within each annotation grouping

Abbreviations: donor-derived cell-free DNA (dd-cfDNA); antibody-mediated rejection (ABMR); T cell mediated rejection (TCMR)

**Supplementary Table 5. Natural killer (NK) cell counts in whole blood from felzartamab patients at Baseline, Week 24 and Week 52 of study**

| Felzartamab patients | CD16high NK cells (cell/ml) |           |           |
|----------------------|-----------------------------|-----------|-----------|
|                      | Baseline                    | Week 24   | Week 52   |
| Patient 2            | 156                         | 24        | 64        |
| <b>Patient 4</b>     | <b>62</b>                   | <b>27</b> | <b>23</b> |
| Patient 5            | 59                          | 3         | 18        |
| Patient 7            | 141                         | 49        | 78        |
| Patient 9            | 140                         | 16        | 96        |
| Patient 12           | 126                         | 8         | 15        |
| Patient 13           | 31                          | 8         | 26        |
| Patient 16           | 560                         | 63        | 154       |
| Patient 19           | 32                          | 8         | 21        |
| Patient 22           | 135                         | 41        | No data   |

**Supplementary Table 6. Top 20 differentially expressed genes between baseline and week24 in biopsies from placebo and felzartamab treated patients sorted by treatment effect (selected by  $\Delta\Delta$  p, sorted by  $\Delta\Delta\logFC$ ).**

| Gene symbol | Gene                                                      | Annotation <sup>1</sup>                        | Differential expression |                            |                      |                  | Mean expression by group |                |                 |                | Cell panel expression <sup>2</sup> |               |       |               |
|-------------|-----------------------------------------------------------|------------------------------------------------|-------------------------|----------------------------|----------------------|------------------|--------------------------|----------------|-----------------|----------------|------------------------------------|---------------|-------|---------------|
|             |                                                           |                                                | $\Delta$ placebo logFC  | $\Delta$ felzartamab logFC | $\Delta\Delta$ logFC | $\Delta\Delta$ P | Placebo                  |                | Felzartamab     |                | HUVEC                              | HUVEC (+IFNg) | RPTEC | RPTEC (+IFNg) |
|             |                                                           |                                                |                         |                            |                      |                  | Baseline (N=10)          | Week 24 (N=10) | Baseline (N=10) | Week 24 (N=10) |                                    |               |       |               |
| FABP5       | fatty acid binding protein 5 (psoriasis-associated)       | Broad, reduced in HUVECs by IFNG               | -0.33                   | 0.33                       | 0.66                 | 0.0203           | 147                      | 93             | 103             | 161            | 3,647                              | 1,947         | 426   | 524           |
| SCGB2A1     | secretoglobin, family 2A, member 1                        | Low expression                                 | -0.13                   | 0.45                       | 0.59                 | 0.0223           | 37                       | 31             | 25              | 48             | 10                                 | 10            | 8     | 9             |
| RGCC        | regulator of cell cycle                                   | Broad; decreased in ABMR                       | -0.18                   | 0.34                       | 0.52                 | 0.0139           | 411                      | 319            | 381             | 610            | 577                                | 758           | 8     | 7             |
| KCNK13      | potassium channel, two pore domain subfamily K, member 13 | Broad                                          | -0.13                   | 0.30                       | 0.43                 | 0.0142           | 39                       | 33             | 36              | 54             | 15                                 | 17            | 9     | 15            |
| SYBU        | syntabulin (syntaxin-interacting)                         | Broad, reduced in RPTECs by IFNG               | -0.13                   | 0.27                       | 0.41                 | 0.0194           | 150                      | 125            | 104             | 152            | 9                                  | 10            | 82    | 66            |
| CCDC92      | coiled-coil domain containing 92                          | Broad, reduced in HUVEC by IFNG                | -0.23                   | 0.15                       | 0.38                 | 0.0183           | 51                       | 37             | 38              | 47             | 299                                | 264           | 736   | 903           |
| RARB        | retinoic acid receptor, beta                              | HUVEC, reduced by IFNG                         | -0.17                   | 0.18                       | 0.35                 | 0.0086           | 217                      | 171            | 189             | 242            | 419                                | 368           | 9     | 19            |
| RECQL5      | RecQ helicase-like 5                                      | Broad, reduced in HUVEC by IFNG                | -0.14                   | 0.19                       | 0.33                 | 0.0155           | 167                      | 137            | 138             | 180            | 142                                | 126           | 123   | 153           |
| TMEM97      | transmembrane protein 97                                  | Broad, reduced in HUVECs by IFNG               | -0.06                   | 0.24                       | 0.30                 | 0.0092           | 190                      | 175            | 153             | 213            | 217                                | 150           | 328   | 609           |
| AVPR2       | arginine vasopressin receptor 2                           | Broad, weakly decreased in ABMR                | -0.09                   | 0.21                       | 0.30                 | 0.0159           | 72                       | 64             | 64              | 85             | 39                                 | 38            | 23    | 22            |
| TRAV12-2    | T cell receptor alpha variable 12-2                       | T cells; weakly expressed in cultured NK cells | 0.25                    | -0.10                      | -0.35                | 0.0173           | 39                       | 55             | 49              | 43             | 21                                 | 21            | 8     | 9             |
| APOL1       | apolipoprotein L1                                         | ABMR-RAT,IFNG-inducible                        | 0.07                    | -0.32                      | -0.39                | 0.0205           | 626                      | 687            | 754             | 483            | 80                                 | 1,011         | 61    | 784           |
| LOC339059   | uncharacterized LOC339059                                 | Weakly increased in EABMR                      | 0.26                    | -0.15                      | -0.41                | 0.0203           | 51                       | 73             | 66              | 53             |                                    |               |       |               |
| SH2D1B      | SH2 domain containing 1B                                  | NKAAG                                          | 0.07                    | -0.44                      | -0.51                | 0.001            | 38                       | 42             | 40              | 22             | 17                                 | 16            | 7     | 9             |
| GBP1        | guanylate binding protein 1, interferon-inducible         | IJAAG                                          | -0.03                   | -0.61                      | -0.59                | 0.0096           | 678                      | 655            | 909             | 389            | 153                                | 6,985         | 92    | 6,274         |
| GZMB        | granzyme B                                                | NKAAG                                          | -0.01                   | -0.62                      | -0.61                | 0.0019           | 149                      | 147            | 143             | 61             | 15                                 | 19            | 12    | 13            |
| FCGR3A      | Fc fragment of IgG, low affinity IIIa, receptor (CD16a)   | NKAAG                                          | 0.06                    | -0.58                      | -0.64                | 0.0167           | 550                      | 602            | 571             | 256            | 15                                 | 14            | 7     | 6             |
| IDO1        | indoleamine 2,3-dioxygenase 1                             | IJAAG                                          | -0.09                   | -0.77                      | -0.68                | 0.0103           | 338                      | 298            | 409             | 140            | 47                                 | 9,620         | 14    | 4,381         |
| CXCL10      | chemokine (C-X-C motif) ligand 10                         | IJAAG                                          | -0.21                   | -0.98                      | -0.77                | 0.0228           | 844                      | 632            | 1,063           | 274            | 32                                 | 9,860         | 15    | 5,049         |
| CXCL11      | chemokine (C-X-C motif) ligand 11                         | IJAAG                                          | -0.16                   | -1.01                      | -0.85                | 0.0176           | 494                      | 395            | 617             | 153            | 14                                 | 6,842         | 5     | 2,161         |

<sup>1</sup> Gene annotations included membership in published pathogenesis-based transcript sets (PBTs) or phenotype associations in published reference sets of kidney transplant biopsies<sup>2</sup>

<sup>2</sup>

\* All FDR > 0.05

53

54

**Supplementary Table 7. Functional enrichment analysis of genes affects by felzartamab treatment between baseline and week 24 (by FDR)**

| library  | ID           | pathway                                                                   | interpretation  | n genes | NES   | FDR    | core enrichment genes                                                                                                           |
|----------|--------------|---------------------------------------------------------------------------|-----------------|---------|-------|--------|---------------------------------------------------------------------------------------------------------------------------------|
| GO       | GO:0006952   | defense response                                                          | ABMR activity   | 20      | -3.07 | 3e-05  | PTPRC, TRIM4, LYZ, PRF1, FCGR1A, KLRD1, CXCL9, GNLY, IL18RAP, CXCL10, APOL1, CXCL11, FCGR3A, IDO1, GBP1, GZMB, SH2D1B           |
| GO       | GO:0009605   | response to external stimulus                                             | ABMR activity   | 20      | -3.07 | 3e-05  | PTPRC, TRIM4, LYZ, PRF1, FCGR1A, KLRD1, CXCL9, GNLY, IL18RAP, CXCL10, APOL1, CXCL11, FCGR3A, IDO1, GBP1, GZMB, SH2D1B           |
| GO       | GO:0009607   | response to biotic stimulus                                               | ABMR activity   | 20      | -3.07 | 3e-05  | PTPRC, TRIM4, LYZ, PRF1, FCGR1A, KLRD1, CXCL9, GNLY, IL18RAP, CXCL10, APOL1, CXCL11, FCGR3A, IDO1, GBP1, GZMB, SH2D1B           |
| GO       | GO:0043207   | response to external biotic stimulus                                      | ABMR activity   | 20      | -3.07 | 3e-05  | PTPRC, TRIM4, LYZ, PRF1, FCGR1A, KLRD1, CXCL9, GNLY, IL18RAP, CXCL10, APOL1, CXCL11, FCGR3A, IDO1, GBP1, GZMB, SH2D1B           |
| GO       | GO:0044419   | biological process involved in interspecies interaction between organisms | ABMR activity   | 20      | -3.07 | 3e-05  | PTPRC, TRIM4, LYZ, PRF1, FCGR1A, KLRD1, CXCL9, GNLY, IL18RAP, CXCL10, APOL1, CXCL11, FCGR3A, IDO1, GBP1, GZMB, SH2D1B           |
| GO       | GO:0051707   | response to other organism                                                | ABMR activity   | 20      | -3.07 | 3e-05  | PTPRC, TRIM4, LYZ, PRF1, FCGR1A, KLRD1, CXCL9, GNLY, IL18RAP, CXCL10, APOL1, CXCL11, FCGR3A, IDO1, GBP1, GZMB, SH2D1B           |
| GO       | GO:0006955   | immune response                                                           | ABMR activity   | 23      | -2.93 | 5e-05  | PTPRC, TRIM4, LYZ, PRF1, FCGR1A, KLRD1, CXCL9, GNLY, IL18RAP, CXCL10, APOL1, CXCL11, TRAV12-2, FCGR3A, IDO1, GBP1, GZMB, SH2D1B |
| GO8      | GO:0002376   | immune system process                                                     | ABMR activity   | 24      | -2.75 | 0.0002 | PTPRC, TRIM4, LYZ, PRF1, FCGR1A, KLRD1, CXCL9, GNLY, IL18RAP, CXCL10, APOL1, CXCL11, TRAV12-2, FCGR3A, IDO1, GBP1, GZMB, SH2D1B |
| Reactome | R-HSA-168256 | Immune System                                                             | ABMR activity   | 14      | -2.45 | 0.0002 | PIK3AP1, PTPRC, TRIM4, KLRD1, LYZ, FCGR1A, KLRD1, GNLY, IL18RAP, CXCL10, FCGR3A, GBP1, SH2D1B                                   |
| DOSE     | DOID:2914    | immune system disease                                                     | ABMR activity   | 10      | -2.56 | 0.0007 | PRF1, FCGR1A, CXCL9, IL18RAP, CXCL10, CXCL11, FCGR3A, IDO1, GZMB                                                                |
| DOSE     | DOID:77      | gastrointestinal system disease                                           | ABMR activity   | 15      | -2.59 | 0.0007 | PTPRC, EPB41L3, LYZ, PRF1, KLRD1, CXCL9, GNLY, IL18RAP, CXCL10, CXCL11, FCGR3A, IDO1, GZMB                                      |
| DOSE     | DOID:1579    | respiratory system disease                                                | immune response | 10      | -2.56 | 0.0007 | PRF1, FCGR1A, CXCL9, IL18RAP, CXCL10, CXCL11, FCGR3A, IDO1, GZMB                                                                |

Abbreviations: normalized enrichment score (NES); false discovery rate (FDR)

**Supplementary Table 8. Effect of treatment on interferon gamma-inducible antibody-mediated rejection activity genes (IIAAG)**

| Gene symbol         | Gene                                              | Baseline – Week 24            |                                   |                             |                  | Week 24 – Week 52             |                                   |                             |                  | Baseline – Week 52            |                                   |                             |                  |
|---------------------|---------------------------------------------------|-------------------------------|-----------------------------------|-----------------------------|------------------|-------------------------------|-----------------------------------|-----------------------------|------------------|-------------------------------|-----------------------------------|-----------------------------|------------------|
|                     |                                                   | $\Delta$ logFC Placebo (N=10) | $\Delta$ logFC Felzartamab (N=10) | $\Delta\Delta$ logFC (N=20) | $\Delta\Delta$ p | $\Delta$ logFC Placebo (N=10) | $\Delta$ logFC Felzartamab (N=10) | $\Delta\Delta$ logFC (N=20) | $\Delta\Delta$ p | $\Delta$ logFC Placebo (N=10) | $\Delta$ logFC Felzartamab (N=10) | $\Delta\Delta$ logFC (N=20) | $\Delta\Delta$ p |
| GBP1                | guanylate binding protein 1, interferon-inducible | -0.03                         | -0.61                             | -0.59                       | 0.0094           | -0.01                         | 0.42                              | 0.42                        | 0.1074           | -0.04                         | -0.36                             | -0.32                       | 0.1533           |
| IDO1                | indoleamine 2,3-dioxygenase 1                     | -0.09                         | -0.77                             | -0.68                       | 0.0106           | -0.04                         | 0.53                              | 0.57                        | 0.1124           | -0.07                         | -0.26                             | -0.19                       | 0.2765           |
| CXCL11              | chemokine (C-X-C motif) ligand 11                 | -0.16                         | -1.01                             | -0.85                       | 0.0190           | -0.07                         | 0.21                              | 0.28                        | 0.1141           | 0.02                          | -0.35                             | -0.37                       | 0.3080           |
| CXCL10              | chemokine (C-X-C motif) ligand 10                 | -0.21                         | -0.98                             | -0.77                       | 0.0243           | 0.09                          | 0.58                              | 0.49                        | 0.1502           | -0.10                         | -0.35                             | -0.25                       | 0.3281           |
| CXCL9               | chemokine (C-X-C motif) ligand 9                  | -0.14                         | -0.94                             | -0.79                       | 0.0311           | 0.00                          | 0.16                              | 0.16                        | 0.1966           | -0.11                         | -0.39                             | -0.28                       | 0.4057           |
| GBP4                | guanylate binding protein 4                       | -0.04                         | -0.38                             | -0.34                       | 0.0737           | -0.03                         | 0.21                              | 0.24                        | 0.2103           | -0.20                         | -0.48                             | -0.28                       | 0.4366           |
| CX3CL1              | chemokine (C-X3-C motif) ligand 1                 | -0.01                         | -0.17                             | -0.16                       | 0.0981           | -0.01                         | 0.26                              | 0.27                        | 0.2265           | -0.15                         | -0.06                             | 0.10                        | 0.4435           |
| PLA1A               | phospholipase A1 member A                         | -0.09                         | -0.34                             | -0.25                       | 0.1549           | 0.16                          | 0.59                              | 0.42                        | 0.2485           | -0.04                         | -0.10                             | -0.06                       | 0.5587           |
| WARS                | tryptophanyl-tRNA synthetase                      | -0.08                         | -0.30                             | -0.22                       | 0.1977           | -0.03                         | 0.08                              | 0.11                        | 0.2843           | -0.07                         | -0.17                             | -0.10                       | 0.5908           |
| IL18BP              | interleukin 18 binding protein                    | -0.15                         | -0.22                             | -0.07                       | 0.5891           | 0.01                          | 0.05                              | 0.03                        | 0.8439           | -0.16                         | -0.13                             | 0.03                        | 0.8604           |
| <i>column means</i> |                                                   | -0.10                         | -0.57                             | -0.47                       |                  | 0.01                          | 0.31                              | 0.30                        |                  | -0.09                         | -0.26                             | -0.17                       |                  |

56

57

**Supplementary Table 9. Effect of treatment on natural killer (NK) cell-expressed antibody-mediated rejection activity genes (NKAAG)**

| Gene symbol | Gene                                                                            | Baseline – Week 24            |                                   |                             |                  | Week 24 – Week 52             |                                   |                             |                  | Baseline – Week 52            |                                   |                             |                  |
|-------------|---------------------------------------------------------------------------------|-------------------------------|-----------------------------------|-----------------------------|------------------|-------------------------------|-----------------------------------|-----------------------------|------------------|-------------------------------|-----------------------------------|-----------------------------|------------------|
|             |                                                                                 | $\Delta$ logFC Placebo (N=10) | $\Delta$ logFC Felzartamab (N=10) | $\Delta\Delta$ logFC (N=20) | $\Delta\Delta$ p | $\Delta$ logFC Placebo (N=10) | $\Delta$ logFC Felzartamab (N=10) | $\Delta\Delta$ logFC (N=20) | $\Delta\Delta$ p | $\Delta$ logFC Placebo (N=10) | $\Delta$ logFC Felzartamab (N=10) | $\Delta\Delta$ logFC (N=20) | $\Delta\Delta$ p |
| SH2D1B      | SH2 domain containing 1B                                                        | 0.07                          | -0.44                             | -0.51                       | 0.0007           | -0.15                         | 0.30                              | 0.45                        | 0.0029           | -0.05                         | -0.19                             | -0.14                       | 0.1652           |
| GZMB        | granzyme B                                                                      | -0.01                         | -0.62                             | -0.61                       | 0.0017           | -0.09                         | 0.45                              | 0.54                        | 0.0050           | -0.11                         | 0.12                              | 0.22                        | 0.1897           |
| KIR2DL2     | killer cell immunoglobulin-like receptor, two domains, long cytoplasmic tail, 2 | 0.08                          | -0.21                             | -0.29                       | 0.0051           | -0.08                         | 0.37                              | 0.45                        | 0.0225           | -0.08                         | 0.04                              | 0.12                        | 0.3093           |
| KLRD1       | killer cell lectin-like receptor subfamily D, member 1                          | -0.06                         | -0.49                             | -0.43                       | 0.0280           | -0.04                         | 0.34                              | 0.38                        | 0.0522           | -0.13                         | -0.42                             | -0.30                       | 0.3353           |
| GPLY        | granulysin                                                                      | -0.18                         | -0.75                             | -0.57                       | 0.0291           | -0.12                         | 0.10                              | 0.21                        | 0.0644           | -0.15                         | -0.04                             | 0.11                        | 0.5800           |
| PRF1        | perforin 1 (pore forming protein)                                               | -0.02                         | -0.35                             | -0.33                       | 0.0333           | -0.06                         | 0.23                              | 0.29                        | 0.0664           | -0.26                         | -0.13                             | 0.12                        | 0.6094           |
| KLRF1       | killer cell lectin-like receptor subfamily F, member 1                          | 0.00                          | -0.41                             | -0.41                       | 0.0376           | -0.08                         | 0.39                              | 0.46                        | 0.0757           | -0.08                         | -0.14                             | -0.06                       | 0.6612           |
| CCL4        | chemokine (C-C motif) ligand 4                                                  | -0.23                         | -0.82                             | -0.59                       | 0.0564           | 0.03                          | 0.33                              | 0.30                        | 0.0787           | -0.26                         | -0.36                             | -0.10                       | 0.6824           |
| TBX21       | T-box 21                                                                        | -0.10                         | -0.28                             | -0.18                       | 0.1707           | 0.00                          | 0.35                              | 0.35                        | 0.0799           | -0.14                         | -0.07                             | 0.08                        | 0.7149           |
| FGR         | FGR proto-oncogene, Src family tyrosine kinase                                  | -0.02                         | -0.16                             | -0.15                       | 0.2127           | -0.04                         | 0.18                              | 0.22                        | 0.1010           | -0.10                         | -0.17                             | -0.06                       | 0.7316           |
| TRDC        | T cell receptor delta constant                                                  | -0.15                         | -0.39                             | -0.24                       | 0.2199           | -0.13                         | 0.02                              | 0.15                        | 0.1419           | -0.21                         | -0.17                             | 0.05                        | 0.7702           |
| XCL1        | chemokine (C motif) ligand 1                                                    | -0.20                         | -0.40                             | -0.20                       | 0.2459           | -0.04                         | 0.31                              | 0.35                        | 0.1516           | -0.14                         | -0.11                             | 0.04                        | 0.7704           |
| FGFBP2      | fibroblast growth factor binding protein 2                                      | -0.22                         | -0.44                             | -0.23                       | 0.3459           | -0.01                         | 0.27                              | 0.27                        | 0.1995           | -0.08                         | -0.12                             | -0.04                       | 0.7721           |
| CD160       | CD160 molecule                                                                  | -0.14                         | -0.33                             | -0.20                       | 0.3506           | 0.03                          | 0.23                              | 0.20                        | 0.2497           | -0.10                         | -0.15                             | -0.05                       | 0.8013           |
| S1PR5       | sphingosine-1-phosphate receptor 5                                              | 0.04                          | -0.06                             | -0.10                       | 0.3865           | -0.08                         | 0.04                              | 0.12                        | 0.3128           | -0.09                         | -0.04                             | 0.05                        | 0.8135           |
| NKG7        | natural killer cell granule protein 7                                           | -0.18                         | -0.28                             | -0.10                       | 0.5045           | 0.10                          | 0.40                              | 0.29                        | 0.3400           | -0.10                         | -0.12                             | -0.03                       | 0.8178           |
| CST7        | cystatin F (leukocystatin)                                                      | -0.24                         | -0.35                             | -0.11                       | 0.5395           | -0.03                         | 0.12                              | 0.15                        | 0.3422           | -0.20                         | -0.16                             | 0.04                        | 0.8409           |
| GZMH        | granzyme H                                                                      | -0.09                         | -0.21                             | -0.12                       | 0.5666           | 0.04                          | 0.18                              | 0.14                        | 0.4199           | 0.00                          | 0.00                              | 0.00                        | 0.9599           |
| KIR2DL3     | killer cell immunoglobulin-like receptor, two domains, long cytoplasmic tail, 3 | 0.03                          | -0.03                             | -0.05                       | 0.5852           | -0.03                         | 0.03                              | 0.06                        | 0.5547           | -0.14                         | -0.15                             | 0.00                        | 0.9951           |
| KLRC3       | killer cell lectin-like receptor subfamily C, member 3                          | -0.14                         | -0.22                             | -0.08                       | 0.6379           | -0.06                         | 0.06                              | 0.11                        | 0.5742           | -0.17                         | -0.17                             | 0.00                        | 0.9990           |
|             | <b>column means</b>                                                             | -0.09                         | -0.36                             | -0.28                       |                  | -0.04                         | 0.24                              | 0.27                        |                  | -0.13                         | -0.13                             | 0.00                        |                  |

**Supplementary Table 10. Effect of treatment on antibody-mediated rejection-associated endothelial genes (AEG)**

| Gene symbol         | Gene                                                                  | Baseline - Week24             |                                   |                             |                  | Week24 - Week52               |                                   |                             |                  | Baseline - Week52             |                                   |                             |                  |
|---------------------|-----------------------------------------------------------------------|-------------------------------|-----------------------------------|-----------------------------|------------------|-------------------------------|-----------------------------------|-----------------------------|------------------|-------------------------------|-----------------------------------|-----------------------------|------------------|
|                     |                                                                       | $\Delta$ logFC Placebo (N=10) | $\Delta$ logFC Felzartamab (N=10) | $\Delta\Delta$ logFC (N=20) | $\Delta\Delta$ p | $\Delta$ logFC Placebo (N=10) | $\Delta$ logFC Felzartamab (N=10) | $\Delta\Delta$ logFC (N=20) | $\Delta\Delta$ p | $\Delta$ logFC Placebo (N=10) | $\Delta$ logFC Felzartamab (N=10) | $\Delta\Delta$ logFC (N=20) | $\Delta\Delta$ p |
| MALL                | mal, T-cell differentiation protein-like                              | -0.01                         | -0.23                             | -0.22                       | 0.0702           | -0.07                         | 0.15                              | 0.21                        | 0.0803           | -0.21                         | -0.05                             | 0.17                        | 0.2882           |
| NOS3                | nitric oxide synthase 3 (endothelial cell)                            | 0.02                          | 0.11                              | 0.08                        | 0.3812           | -0.10                         | 0.01                              | 0.11                        | 0.3617           | -0.12                         | 0.02                              | 0.14                        | 0.3269           |
| TM4SF18             | transmembrane 4 L six family member 18                                | 0.04                          | -0.05                             | -0.09                       | 0.4501           | -0.03                         | 0.09                              | 0.12                        | 0.4457           | -0.14                         | -0.05                             | 0.08                        | 0.4478           |
| RASIP1              | Ras interacting protein 1                                             | -0.08                         | -0.01                             | 0.07                        | 0.5040           | -0.13                         | -0.02                             | 0.12                        | 0.4607           | -0.09                         | 0.03                              | 0.11                        | 0.4601           |
| CDH5                | cadherin 5, type 2 (vascular endothelium)                             | -0.02                         | -0.09                             | -0.07                       | 0.5497           | -0.06                         | 0.03                              | 0.09                        | 0.4849           | -0.07                         | 0.02                              | 0.09                        | 0.4957           |
| PECAM1              | platelet/endothelial cell adhesion molecule 1                         | -0.12                         | -0.05                             | 0.07                        | 0.6339           | 0.00                          | 0.07                              | 0.07                        | 0.6120           | 0.09                          | 0.14                              | 0.06                        | 0.5492           |
| CDH13               | cadherin 13                                                           | -0.04                         | -0.14                             | -0.10                       | 0.6651           | -0.05                         | 0.00                              | 0.06                        | 0.6773           | -0.13                         | -0.04                             | 0.09                        | 0.5853           |
| TEK                 | TEK tyrosine kinase, endothelial                                      | -0.08                         | -0.03                             | 0.05                        | 0.7444           | 0.03                          | 0.09                              | 0.06                        | 0.7157           | -0.12                         | -0.06                             | 0.06                        | 0.6446           |
| ERG                 | v-ets avian erythroblastosis virus E26 oncogene homolog               | -0.02                         | 0.02                              | 0.04                        | 0.7906           | 0.04                          | 0.08                              | 0.04                        | 0.7264           | -0.07                         | -0.12                             | -0.05                       | 0.6886           |
| MMRN2               | multimerin 2                                                          | -0.06                         | -0.03                             | 0.03                        | 0.7933           | 0.06                          | 0.04                              | -0.03                       | 0.7845           | -0.03                         | 0.01                              | 0.04                        | 0.7442           |
| ROBO4               | roundabout guidance receptor 4                                        | -0.07                         | -0.10                             | -0.03                       | 0.8085           | -0.05                         | -0.03                             | 0.02                        | 0.8458           | 0.03                          | -0.03                             | -0.06                       | 0.7940           |
| IFI27               | interferon, alpha-inducible protein 27                                | -0.20                         | -0.24                             | -0.04                       | 0.8454           | -0.05                         | -0.03                             | 0.02                        | 0.8458           | 0.03                          | -0.03                             | -0.06                       | 0.7940           |
| ECSCR               | endothelial cell surface expressed chemotaxis and apoptosis regulator | -0.16                         | -0.13                             | 0.03                        | 0.8563           | 0.07                          | 0.11                              | 0.04                        | 0.8656           | -0.06                         | -0.04                             | 0.02                        | 0.8682           |
| ADGRL4              | adhesion G protein-coupled receptor L4                                | -0.02                         | -0.04                             | -0.02                       | 0.8964           | 0.04                          | 0.06                              | 0.02                        | 0.8668           | -0.09                         | -0.08                             | 0.01                        | 0.9103           |
| RAPGEF5             | Rap guanine nucleotide exchange factor 5                              | -0.06                         | -0.06                             | 0.00                        | 0.9779           | -0.03                         | -0.05                             | -0.02                       | 0.8827           | -0.09                         | -0.08                             | 0.01                        | 0.9103           |
| GNG11               | guanine nucleotide binding protein (G protein), gamma 11              | -0.07                         | -0.07                             | 0.00                        | 0.9798           | -0.06                         | -0.05                             | 0.01                        | 0.9250           | -0.08                         | -0.08                             | -0.01                       | 0.9617           |
| <b>column means</b> |                                                                       | -0.06                         | -0.07                             | -0.01                       |                  | -0.02                         | 0.04                              | 0.05                        |                  | -0.07                         | -0.03                             | 0.04                        |                  |

**Supplementary Table 11. Top 20 genes increased by felzartamab between baseline and week 24 (by P-value)**

| Gene symbol | Gene                                                      | Differential expression |                     |          |        | Mean expression by group |               |               |                 |               |               | Cell panel expression |               |       |               | Correlation with ABMR activity genesets in all K5086 <sup>1</sup> |        |       |        |       |        |       |        |
|-------------|-----------------------------------------------------------|-------------------------|---------------------|----------|--------|--------------------------|---------------|---------------|-----------------|---------------|---------------|-----------------------|---------------|-------|---------------|-------------------------------------------------------------------|--------|-------|--------|-------|--------|-------|--------|
|             |                                                           | Δ placebo logFC         | Δ felzartamab logFC | ΔΔ logFC | ΔΔ P   | Placebo                  |               |               | Felzartamab     |               |               | HUVEC                 | HUVEC (+IFNg) | RPTEC | RPTEC (+IFNg) | AAG                                                               |        | IIAAG |        | NKAAG |        | AEG   |        |
|             |                                                           |                         |                     |          |        | Baseline (N=10)          | Week24 (N=10) | Week52 (N=10) | Baseline (N=10) | Week24 (N=10) | Week52 (N=10) |                       |               |       |               | SCC                                                               | p      | SCC   | p      | SCC   | p      | SCC   | p      |
| RARB        | retinoic acid receptor, beta                              | -0.17                   | 0.18                | 0.35     | 0.0086 | 217                      | 171           | 193           | 189             | 242           | 207           | 419                   | 368           | 9     | 19            | 0.03                                                              | 8e-02  | 0.04  | 1e-02  | 0.04  | 3e-03  | 0.40  | 2e-195 |
| TMEM97      | transmembrane protein 97                                  | -0.06                   | 0.24                | 0.30     | 0.0092 | 190                      | 175           | 152           | 153             | 213           | 180           | 217                   | 150           | 328   | 609           | -0.21                                                             | 1e-50  | -0.19 | 4e-44  | -0.22 | 6e-57  | 0.03  | 2e-02  |
| RGCC        | regulator of cell cycle                                   | -0.18                   | 0.34                | 0.52     | 0.0139 | 411                      | 319           | 349           | 381             | 610           | 401           | 577                   | 758           | 8     | 7             | -0.13                                                             | 9e-20  | -0.14 | 7e-23  | -0.09 | 7e-11  | 0.14  | 2e-25  |
| KCNK13      | potassium channel, two pore domain subfamily K, member 13 | -0.13                   | 0.30                | 0.43     | 0.0142 | 39                       | 33            | 30            | 36              | 54            | 38            | 15                    | 17            | 9     | 15            | -0.03                                                             | 3e-02  | -0.01 | 6e-01  | -0.04 | 2e-03  | 0.17  | 2e-33  |
| RECQL5      | RecQ helicase-like 5                                      | -0.14                   | 0.19                | 0.33     | 0.0155 | 167                      | 137           | 148           | 138             | 180           | 145           | 142                   | 126           | 123   | 153           | -0.08                                                             | 1e-08  | -0.10 | 1e-12  | -0.06 | 6e-05  | 0.16  | 4e-31  |
| AVPR2       | arginine vasopressin receptor 2                           | -0.09                   | 0.21                | 0.30     | 0.0159 | 72                       | 64            | 60            | 64              | 85            | 71            | 39                    | 38            | 23    | 22            | -0.22                                                             | 7e-57  | -0.23 | 1e-61  | -0.18 | 4e-38  | 0.09  | 6e-11  |
| CCDC92      | coiled-coil domain containing 92                          | -0.23                   | 0.15                | 0.38     | 0.0183 | 51                       | 37            | 43            | 38              | 47            | 38            | 299                   | 264           | 736   | 903           | -0.08                                                             | 1e-08  | -0.12 | 3e-18  | -0.05 | 9e-04  | 0.07  | 2e-06  |
| SYBU        | syntabulin (syntaxin-interacting)                         | -0.13                   | 0.27                | 0.41     | 0.0194 | 150                      | 125           | 127           | 104             | 152           | 150           | 9                     | 10            | 82    | 66            | -0.07                                                             | 3e-07  | -0.10 | 4e-13  | -0.03 | 3e-02  | 0.42  | 1e-211 |
| FABP5       | fatty acid binding protein 5 (psoriasis-associated)       | -0.33                   | 0.33                | 0.66     | 0.0203 | 147                      | 93            | 125           | 103             | 161           | 91            | 3,647                 | 1,947         | 426   | 524           | 0.33                                                              | 4e-130 | 0.30  | 9e-107 | 0.33  | 3e-132 | 0.44  | 5e-240 |
| SCGB2A1     | secretoglobin, family 2A, member 1                        | -0.13                   | 0.45                | 0.59     | 0.0223 | 37                       | 31            | 40            | 25              | 48            | 35            | 10                    | 10            | 8     | 9             | -0.08                                                             | 2e-08  | -0.09 | 1e-09  | -0.09 | 7e-10  | 0.17  | 6e-34  |
| TRAV12-3    | T cell receptor alpha variable 12-3                       | -0.22                   | 0.17                | 0.39     | 0.0240 | 16                       | 12            | 18            | 12              | 15            | 13            | 8                     | 8             | 6     | 6             | 0.45                                                              | 4e-250 | 0.40  | 2e-190 | 0.49  | 0e+00  | 0.09  | 2e-10  |
| RASL11A     | RAS-like, family 11, member A                             | -0.33                   | 0.08                | 0.41     | 0.0242 | 100                      | 63            | 67            | 85              | 95            | 95            | 30                    | 33            | 10    | 16            | -0.17                                                             | 1e-33  | -0.18 | 4e-39  | -0.15 | 4e-27  | 0.04  | 3e-03  |
| OLFM1       | olfactomedin 1                                            | -0.14                   | 0.35                | 0.49     | 0.0260 | 157                      | 129           | 158           | 107             | 173           | 134           | 64                    | 64            | 36    | 48            | 0.13                                                              | 1e-19  | 0.09  | 3e-11  | 0.19  | 5e-41  | 0.56  | 0e+00  |
| CEMP1       | cell migration inducing protein, hyaluronan binding       | -0.15                   | 0.23                | 0.38     | 0.0272 | 29                       | 23            | 25            | 21              | 29            | 30            | 50                    | 51            | 30    | 28            | 0.16                                                              | 1e-29  | 0.10  | 7e-14  | 0.23  | 9e-63  | 0.20  | 2e-48  |
| KAZN        | kazrin, periplakin interacting protein                    | -0.15                   | 0.14                | 0.29     | 0.0285 | 446                      | 361           | 362           | 415             | 501           | 405           | 106                   | 85            | 603   | 1,004         | -0.22                                                             | 1e-58  | -0.22 | 8e-55  | -0.26 | 1e-78  | -0.06 | 4e-05  |
| AMPH        | amphiphysin                                               | -0.06                   | 0.32                | 0.38     | 0.0289 | 37                       | 34            | 32            | 30              | 47            | 35            | 227                   | 57            | 7     | 13            | -0.22                                                             | 3e-58  | -0.22 | 4e-56  | -0.19 | 9e-43  | 0.27  | 5e-85  |
| RAB11FIP4   | RAB11 family interacting protein 4 (class II)             | -0.16                   | 0.11                | 0.28     | 0.0323 | 113                      | 90            | 83            | 91              | 106           | 87            | 31                    | 36            | 19    | 23            | -0.12                                                             | 3e-19  | -0.12 | 1e-17  | -0.12 | 4e-17  | -0.01 | 6e-01  |
| MYZAP       | myocardial zonula adherens protein                        | -0.21                   | 0.24                | 0.44     | 0.0323 | 61                       | 46            | 48            | 47              | 66            | 57            | 127                   | 128           | 13    | 14            | -0.10                                                             | 1e-13  | -0.10 | 3e-13  | -0.06 | 4e-06  | 0.42  | 8e-221 |
| ADH1C       | alcohol dehydrogenase 1C (class I), gamma polypeptide     | -0.16                   | 0.26                | 0.42     | 0.0367 | 403                      | 324           | 276           | 293             | 422           | 397           | 10                    | 10            | 8     | 12            | -0.24                                                             | 2e-69  | -0.22 | 6e-57  | -0.20 | 4e-48  | 0.16  | 2e-30  |
| RPL35A      | ribosomal protein L35a                                    | -0.19                   | 0.14                | 0.34     | 0.0370 | 159                      | 122           | 153           | 128             | 155           | 109           | 6,482                 | 5,672         | 2,696 | 3,454         | 0.16                                                              | 3e-31  | 0.12  | 7e-19  | 0.14  | 4e-25  | 0.20  | 2e-49  |

<sup>1</sup> Cohort of 5086 kidney allograft biopsies  
Abbreviations: pathogenesis-based transcript set (PBT); antibody-mediated rejection (ABMR); ABMR activity genes (AAG); interferon gamma ABMR activity genes (IIAAG); natural killer (NK) cell-expressed antibody mediated rejection genes (NKAAG); antibody-mediated rejection-associated endothelial genes (AEG); spearman correlation coefficient (SCC).

60

61

**Supplementary Table 12A. Top 20 differentially expressed genes between baseline and week 52 in biopsies from placebo and felzartamab treated patients (selected by P-value, sorted by  $\Delta\Delta\logFC$ )**

| Gene symbol  | Gene                                                                       | Annotation <sup>1</sup>          | Differential expression |                            |                      |                               | Mean expression by group |               |               |                 |               |               |
|--------------|----------------------------------------------------------------------------|----------------------------------|-------------------------|----------------------------|----------------------|-------------------------------|--------------------------|---------------|---------------|-----------------|---------------|---------------|
|              |                                                                            |                                  | $\Delta$ placebo logFC  | $\Delta$ felzartamab logFC | $\Delta\Delta$ logFC | $\Delta\Delta$ P <sup>*</sup> | Placebo                  |               |               | Felzartamab     |               |               |
|              |                                                                            |                                  |                         |                            |                      |                               | Baseline (N=10)          | Week24 (N=10) | Week52 (N=10) | Baseline (N=10) | Week24 (N=10) | Week52 (N=10) |
| HNRNPK       | heterogeneous nuclear ribonucleoprotein K                                  | injury-induced CKDAKI, AKI2      | 0.28                    | -0.38                      | -0.66                | 0.0055                        | 818                      | 1,044         | 1,203         | 1,096           | 1,059         | 649           |
| COL1A1       | collagen, type I, alpha 1                                                  | COLA1356,FICOL,IRITD5            | 0.38                    | -0.26                      | -0.64                | 0.0075                        | 310                      | 333           | 526           | 329             | 320           | 230           |
| NFIX         | nuclear factor I/X (CCAAT-binding transcription factor)                    | Injury induced in AKI            | 0.42                    | -0.15                      | -0.57                | 0.0012                        | 162                      | 179           | 289           | 221             | 167           | 180           |
| RHOA         | ras homolog family member A                                                | IRRAT950                         | 0.28                    | -0.29                      | -0.57                | 0.0049                        | 691                      | 803           | 1,017         | 923             | 809           | 620           |
| COL1A2       | collagen, type I, alpha 2                                                  | FICOL,IRITD5,LivGST_UP           | 0.26                    | -0.31                      | -0.57                | 0.0118                        | 1,238                    | 1,152         | 1,769         | 1,534           | 1,194         | 997           |
| ITGB3        | integrin beta 3                                                            | IRRAT30,IRRAT950                 | 0.34                    | -0.21                      | -0.55                | 0.0100                        | 105                      | 137           | 169           | 110             | 103           | 82            |
| LOC100129518 | uncharacterized LOC100129518                                               | GRIT3,IRRAT950                   | 0.25                    | -0.22                      | -0.47                | 0.0050                        | 429                      | 546           | 605           | 527             | 461           | 390           |
| ACTB         | actin, beta                                                                | IRRAT950                         | 0.15                    | -0.31                      | -0.47                | 0.0077                        | 6,451                    | 7,352         | 7,993         | 7,274           | 5,662         | 4,720         |
| SPARC        | secreted protein, acidic, cysteine-rich (osteonectin)                      | IRITD3                           | 0.16                    | -0.30                      | -0.46                | 0.0100                        | 2,411                    | 2,532         | 3,011         | 2,343           | 2,094         | 1,550         |
| DNAJA4       | DnaJ (Hsp40) homolog, subfamily A, member 4                                | IRRAT950                         | 0.27                    | -0.14                      | -0.42                | 0.0095                        | 49                       | 68            | 72            | 68              | 61            | 56            |
| SLFN5        | schlafen family member 5                                                   | injury-induced CKDAKI, AKI2      | 0.19                    | -0.20                      | -0.40                | 0.0050                        | 39                       | 44            | 51            | 49              | 38            | 37            |
| CYR61        | cysteine-rich, angiogenic inducer, 61                                      | IRITD3,IRRAT950                  | 0.14                    | -0.26                      | -0.40                | 0.0074                        | 271                      | 268           | 330           | 338             | 234           | 236           |
| SDCBP        | syndecan binding protein                                                   | Injury induced CKDAKI, AKI2      | 0.24                    | -0.14                      | -0.38                | 0.0120                        | 1,135                    | 1,404         | 1,582         | 1,478           | 1,358         | 1,224         |
| SBSPON       | somatomedin B and thrombospondin type 1 domain containing                  | Injury induced up in CKDAKI      | 0.31                    | -0.08                      | -0.38                | 0.0123                        | 217                      | 250           | 332           | 188             | 249           | 169           |
| PAFAH1B2     | platelet-activating factor acetylhydrolase 1b, catalytic subunit 2 (30kDa) | injury-induced AKI2              | 0.23                    | -0.13                      | -0.36                | 0.0099                        | 309                      | 372           | 423           | 386             | 396           | 323           |
| TMEM2        | transmembrane protein 2                                                    | Injury induced CKDAKI, AKI2      | 0.10                    | -0.26                      | -0.36                | 0.0118                        | 270                      | 307           | 311           | 318             | 259           | 222           |
| WNK1         | WNK lysine deficient protein kinase 1                                      | Injury induced up AKI2 down AKI1 | 0.26                    | -0.08                      | -0.34                | 0.0104                        | 703                      | 884           | 1,012         | 894             | 996           | 799           |
| DACH2        | dachshund family transcription factor 2                                    | Suppressed in AKI2               | -0.06                   | 0.26                       | 0.32                 | 0.0106                        | 32                       | 32            | 29            | 29              | 33            | 42            |
| AADA4L4      | arylacetamide deacetylase-like 4                                           | Suppressed in AKI                | -0.20                   | 0.28                       | 0.49                 | 0.0040                        | 19                       | 13            | 14            | 14              | 15            | 21            |
| RERGL        | RERG/RAS-like                                                              | Suppressed in AKI                | -0.35                   | 0.30                       | 0.65                 | 0.0048                        | 215                      | 166           | 133           | 145             | 158           | 221           |

\* All FDR > 0.05

<sup>1</sup> Gene annotations included membership in published pathogenesis-based transcript sets (PBTs) or phenotype associations in published reference sets of kidney transplant biopsies<sup>2,3</sup>

<sup>2</sup> Halloran, P.F., et al. Discovering novel injury features in kidney transplant biopsies associated with TCMR and donor aging. *Am J Transplant* **21**, 1725-1739 (2021).

<sup>3</sup> Halloran, P.F., et al. Archetypal Analysis of Injury in Kidney Transplant Biopsies Identifies Two Classes of Early AKI. *Front Med (Lausanne)* **9**, 817324 (2022).

62

63

**Supplementary Table 12B. Top Hinze-defined injury genes differentially-expressed between baseline and week 52 biopsies from placebo and felzartamab treated patients (by P-value)**

| Gene symbol | Gene                                                        | PBT annotation  | Cellular expression in AKI <sup>1</sup>               | $\Delta\Delta$ logFC | $\Delta\Delta$ FC | $\Delta\Delta$ P | $\Delta\Delta$ FDR | Mean expression by group |               |                 |               |
|-------------|-------------------------------------------------------------|-----------------|-------------------------------------------------------|----------------------|-------------------|------------------|--------------------|--------------------------|---------------|-----------------|---------------|
|             |                                                             |                 |                                                       |                      |                   |                  |                    | Placebo                  |               | Felzartamab     |               |
|             |                                                             |                 |                                                       |                      |                   |                  |                    | Baseline (N=10)          | Week52 (N=10) | Baseline (N=10) | Week52 (N=10) |
| SLFN5       | schlafen family member 5                                    |                 | CNT-New2,CD-IC-New2                                   | -0.40                | 0.76              | <b>0.0050</b>    | 0.9625             | 39                       | 51            | 49              | 37            |
| CYR61       | cysteine-rich, angiogenic inducer, 61                       | IRITD3,IRRAT950 | CNT-New3                                              | -0.40                | 0.76              | <b>0.0074</b>    | 0.9625             | 271                      | 330           | 338             | 236           |
| SPARC       | secreted protein, acidic, cysteine-rich (osteonectin)       | IRITD3          | <b>PT-New4</b>                                        | -0.46                | 0.73              | <b>0.0100</b>    | 0.9625             | 2,411                    | 3,011         | 2,343           | 1,550         |
| CEBPB       | CCAAT/enhancer binding protein (C/EBP), beta                | IRITD3          | CNT-New2,CD-IC-New1                                   | -0.33                | 0.80              | <b>0.0123</b>    | 0.9625             | 419                      | 488           | 417             | 307           |
| ADAM10      | ADAM metalloproteinase domain 10                            | IRRAT950        | CNT-New3                                              | -0.41                | 0.75              | <b>0.0148</b>    | 0.9625             | 157                      | 235           | 210             | 177           |
| VIM         | vimentin                                                    | IRITD3,IRRAT950 | <b>PT-New4</b> ,CNT-New3                              | -0.34                | 0.79              | <b>0.0244</b>    | 0.9625             | 7,744                    | 9,738         | 7,479           | 5,842         |
| LRRFIP1     | leucine rich repeat (in FLII) interacting protein 1         |                 | CNT-New3,CD-PC-New2                                   | -0.33                | 0.80              | <b>0.0332</b>    | 0.9625             | 981                      | 1,368         | 1,092           | 964           |
| TPM4        | tropomyosin 4                                               | IRITD3          | CNT-New1                                              | -0.29                | 0.82              | <b>0.0400</b>    | 0.9625             | 748                      | 1,073         | 739             | 709           |
| USP1        | dual specificity phosphatase 1                              | IRRAT950        | CNT-New1                                              | -0.34                | 0.79              | <b>0.0438</b>    | 0.9625             | 317                      | 332           | 376             | 247           |
| DOCK11      | dedicator of cytokinesis 11                                 |                 | <b>PT-New4</b>                                        | -0.34                | 0.79              | <b>0.0445</b>    | 0.9625             | 301                      | 430           | 311             | 277           |
| HLA-DRB1    | major histocompatibility complex, class II, DR beta 1       | ABMR-RAT,GRIT3  | PT-New1,CNT-New2,CD-IC-New2                           | -0.50                | 0.71              | <b>0.0447</b>    | 0.9625             | 5,280                    | 5,409         | 5,462           | 2,784         |
| KLF6        | Kruppel-like factor 6                                       | IRITD3,IRRAT950 | PT-New2, <b>TAL-New4</b> ,DCT-New2,CNT-New3,others    | -0.31                | 0.80              | <b>0.0462</b>    | 0.9625             | 707                      | 794           | 746             | 542           |
| NRP1        | neuropilin 1                                                | IRRAT950        | <b>DCT-New4</b>                                       | -0.34                | 0.79              | <b>0.0489</b>    | 0.9625             | 706                      | 1,000         | 851             | 755           |
| RARRES3     | retinoic acid receptor responder (tazarotene induced) 3     | GRIT3,TCMR-RAT  | <b>PT-New4</b> ,CNT-New2,CD-IC-New2                   | -0.40                | 0.76              | <b>0.0493</b>    | 0.9625             | 1,421                    | 1,375         | 1,664           | 922           |
| ARL6IP5     | ADP-ribosylation factor like GTPase 6 interacting protein 5 | IRRAT950        | CD-IC-New2                                            | -0.25                | 0.84              | 0.0546           | 0.9625             | 1,182                    | 1,410         | 1,454           | 1,221         |
| FGFR1       | fibroblast growth factor receptor 1                         |                 | DCT-New2,CD-PC-New2,CD-IC-New1                        | -0.28                | 0.83              | 0.0569           | 0.9625             | 520                      | 561           | 466             | 342           |
| MMP7        | matrix metalloproteinase 7                                  | IRITD5          | <b>PT-New4</b> , <b>TAL-New4</b> ,CNT-New1,CD-IC-New2 | -0.73                | 0.60              | 0.0574           | 0.9625             | 4,171                    | 7,983         | 3,487           | 2,414         |
| TSC22D1     | TSC22 domain family, member 1                               | IRITD3          | TAL-New3,CD-IC-New2                                   | -0.25                | 0.84              | 0.0650           | 0.9625             | 2,422                    | 2,979         | 2,793           | 2,437         |
| WWC1        | WW and C2 domain containing 1                               |                 | <b>DCT-New4</b> ,CNT-New3                             | -0.23                | 0.85              | 0.0668           | 0.9625             | 666                      | 794           | 823             | 718           |
| HLA-E       | major histocompatibility complex, class I, E                | ABMR-RAT, GRIT3 | <b>PT-New4</b> ,TAL-New3,DCT-New3,CNT-New2,others     | -0.49                | 0.71              | 0.0692           | 0.9625             | 4,646                    | 4,731         | 4,896           | 2,517         |

<sup>1</sup>In the genes differentially expressed at week 52 vs. baseline (figure 4), we identified as injury-related genes annotated by Hinze et al, and looked at the single cell expression of the top 20 by p value (Table S12A). All showed decreased expression vs. baseline ( $\Delta\Delta$  FC), 14 significant ( $\Delta\Delta$  P), i.e. blue symbols in figure 4. Seven had been designated in the new injury “new4” pathways that are associated with fibrosis and EMT.

**Supplementary Table 13. Functional enrichment analysis of genes affected by felzartamab treatment between baseline and week 52 (by FDR)**

| library            | ID            | pathway                                  | interpretation                    | n genes | NES   | FDR    | core enrichment genes                                                                                                                                                                                                                                           |
|--------------------|---------------|------------------------------------------|-----------------------------------|---------|-------|--------|-----------------------------------------------------------------------------------------------------------------------------------------------------------------------------------------------------------------------------------------------------------------|
| Reactome           | R-HSA-168249  | Innate Immune System                     | immune-related response to injury | 20      | -3.18 | 2e-06  | LRRFIP1, C1QB, JUN, ATP6V1A, NCF2, CFI, EP300, FCGR1A, CAPZA1, CAPZA2, ADAM10, HSPA1A, STAT6, CALM2, SDCBP, PAFAH1B2, ACTB, RHOA                                                                                                                                |
| Reactome           | R-HSA-168256  | Immune System                            | immune-related response to injury | 35      | -3.08 | 2e-05  | LRRFIP1, C1QB, CANX, JUN, ATP6V1A, RNF213, NCF2, PIK3AP1, VIM, CFI, EP300, FCGR1A, CAPZA1, CAPZA2, ADAM10, HSPA1A, IFNGR1, STAT6, CALM2, SDCBP, COL1A2, PAFAH1B2, ACTB, COL1A1, RHOA                                                                            |
| Hinze <sup>1</sup> | AKI           | Cellular response to acute kidney injury | response to injury                | 39      | -2.75 | 4e-05  | SPTBN1, NRP1, KLF6, HLA-DRB1, DOCK11, DUSP1, CHSY1, LDHA, CDC42SE2, TPM4, PTBP3, ARHGAP29, SYNE2, SERP1, CORO1C, LRRFIP1, PPFIBP1, CANX, JUN, SCOC, RNF213, SPP1, PIK3AP1, VIM, SVIL, TPM3, RAN, ANXA5, ADAM10, HSPA1A, CEBPB, SPARC, ACTB, HNRNPK, SLFN5, RHOA |
| Reactome           | R-HSA-9006934 | Signaling by Receptor Tyrosine Kinases   | response to injury                | 19      | -2.59 | 0.0002 | ATP6V1A, SPP1, NCF2, SIN3A, EP300, ADAM10, STAT6, CALM2, COL1A2, SPARC, ITGB3, ACTB, COL1A1, RHOA                                                                                                                                                               |
| Reactome           | R-HSA-1643685 | Disease                                  | immune-related response to injury | 30      | -2.68 | 0.0002 | LRRFIP1, PPFIBP1, CANX, JUN, RNF213, CD163, PIK3AP1, TPM3, SIN3A, EP300, FCGR1A, RAN, ADAM10, HSPA1A, IFNGR1, CALM2, CEBPB, SBSPON, ITGB3, ACTB, HNRNPK                                                                                                         |
| Reactome           | R-HSA-597592  | Post-translational protein modification  | response to injury                | 17      | -2.68 | 0.0002 | CANX, SPP1, PRMT3, PPP6R3, SIN3A, EP300, CAPZA1, CAPZA2, ADAM10, CALM2, SBSPON, ACTB, HNRNPK, RHOA                                                                                                                                                              |
| Reactome           | R-HSA-109582  | Hemostasis                               | response to injury                | 17      | -2.54 | 0.0005 | SIN3A, CAPZA1, CAPZA2, ANXA5, CALM2, COL1A2, SPARC, ITGB3, ACTB, COL1A1, RHOA                                                                                                                                                                                   |
| Reactome           | R-HSA-5653656 | Vesicle-mediated transport               | response to injury                | 15      | -2.47 | 0.0005 | SCOC, AP4B1, CD163, PPP6R3, CAPZA1, CAPZA2, CALM2, COL1A2, SPARC, PAFAH1B2, ACTB, COL1A1                                                                                                                                                                        |
| Reactome           | R-HSA-392499  | Metabolism of proteins                   | response to injury                | 19      | -2.42 | 0.0005 | PRMT3, PPP6R3, SIN3A, EP300, CAPZA1, CAPZA2, ADAM10, CALM2, SBSPON, ACTB, HNRNPK, RHOA                                                                                                                                                                          |
| Reactome           | R-HSA-5663205 | Infectious disease                       | immune-related response to injury | 15      | -2.45 | 0.0005 | CANX, JUN, RNF213, CD163, EP300, FCGR1A, RAN, HSPA1A, IFNGR1, CALM2, ACTB, HNRNPK                                                                                                                                                                               |
| Reactome           | R-HSA-2262752 | Cellular responses to stress             | response to injury                | 14      | -2.35 | 0.0008 | DNAJB6, EIF2S3, SERP1, JUN, ATP6V1A, NCF2, SIN3A, EP300, CAPZA1, CAPZA2, HSPA1A, CEBPB, DNAJA4                                                                                                                                                                  |
| Reactome           | R-HSA-8953897 | Cellular responses to stimuli            | response to injury                | 14      | -2.35 | 0.0008 | DNAJB6, EIF2S3, SERP1, JUN, ATP6V1A, NCF2, SIN3A, EP300, CAPZA1, CAPZA2, HSPA1A, CEBPB, DNAJA4                                                                                                                                                                  |

<sup>1</sup>Hinze, C., et al. Single-cell transcriptomics reveals common epithelial response patterns in human acute kidney injury. *Genome Med* **14**(1), 103 (2022).

Abbreviations: normalized enrichment score (NES); false discovery rate (FDR)

**Supplementary Table 14. Definition of ABMR activity genes**

| Gene symbol | Gene                                                    | PBT annotation       | Cell panel expression |       |       |                      |                         | Correlation with ABMR in K5086 <sup>1</sup> |               |                 |               | Correlation with dd-cfDNA in N604 <sup>2</sup> |                         |
|-------------|---------------------------------------------------------|----------------------|-----------------------|-------|-------|----------------------|-------------------------|---------------------------------------------|---------------|-----------------|---------------|------------------------------------------------|-------------------------|
|             |                                                         |                      | NK                    | CD4   | CD8   | HUVEC (unstimulated) | HUVEC (IFNg stimulated) | SCC EABMR K5086                             | p EABMR K5086 | SCC FABMR K5086 | p FABMR K5086 | SCC dd-cfDNA (cp/mL) N604                      | p dd-cfDNA (cp/mL) N604 |
| FGFBP2      | fibroblast growth factor binding protein 2              | ABMR-RAT,DSAST       | 7,651                 | 102   | 913   | 11                   | 12                      | 0.46                                        | 1e-259        | 0.48            | 2e-298        | 0.47                                           | 2e-21                   |
| GNLY        | granulysin                                              | ABMR-RAT,DSAST,QCAT  | 11,561                | 5,121 | 8,299 | 35                   | 34                      | 0.38                                        | 7e-175        | 0.46            | 5e-268        | 0.52                                           | 2e-26                   |
| CXCL11      | chemokine (C-X-C motif) ligand 11                       | ABMR-RAT,GRIT3       | 9                     | 7     | 7     | 14                   | 6,842                   | 0.31                                        | 4e-112        | 0.48            | 9e-290        | 0.58                                           | 5e-35                   |
| S1PR5       | sphingosine-1-phosphate receptor 5                      | ABMR-RAT             | 347                   | 19    | 18    | 31                   | 32                      | 0.31                                        | 4e-112        | 0.48            | 4e-299        | 0.50                                           | 1e-24                   |
| PLA1A       | phospholipase A1 member A                               | ABMR-RAT,DSAST,GRIT3 | 18                    | 13    | 15    | 17                   | 545                     | 0.29                                        | 1e-100        | 0.63            | 0e+00         | 0.58                                           | 2e-34                   |
| CXCL10      | chemokine (C-X-C motif) ligand 10                       | ABMR-RAT,GRIT1       | 20                    | 21    | 18    | 32                   | 9,860                   | 0.29                                        | 4e-98         | 0.45            | 3e-251        | 0.58                                           | 2e-34                   |
| CXCL9       | chemokine (C-X-C motif) ligand 9                        | ABMR-RAT,GRIT1       | 27                    | 18    | 23    | 41                   | 11,888                  | 0.29                                        | 5e-97         | 0.47            | 3e-275        | 0.58                                           | 8e-34                   |
| CCL4L1      | chemokine (C-C motif) ligand 4-like 1                   | ABMR-RAT             |                       |       |       |                      |                         | 0.28                                        | 6e-90         | 0.44            | 2e-239        | 0.54                                           | 4e-29                   |
| KLRD1       | killer cell lectin-like receptor subfamily D, member 1  | ABMR-RAT             | 1,465                 | 22    | 119   | 26                   | 22                      | 0.28                                        | 2e-89         | 0.47            | 1e-283        | 0.55                                           | 5e-30                   |
| CCL4        | chemokine (C-C motif) ligand 4                          | ABMR-RAT             | 3,200                 | 266   | 1,977 | 35                   | 30                      | 0.27                                        | 2e-85         | 0.49            | 3e-308        | 0.60                                           | 5e-37                   |
| CCL3        | chemokine (C-C motif) ligand 3                          | ABMR-RAT             | 622                   | 243   | 2,098 | 18                   | 15                      | 0.26                                        | 2e-80         | 0.41            | 3e-210        | 0.55                                           | 7e-31                   |
| WARS        | tryptophanyl-tRNA synthetase                            | ABMR-RAT,GRIT3       | 344                   | 337   | 302   | 910                  | 10,642                  | 0.26                                        | 2e-78         | 0.49            | 0e+00         | 0.62                                           | 4e-41                   |
| NKG7        | natural killer cell granule protein 7                   | ABMR-RAT,QCAT        | 8,535                 | 369   | 3,138 | 21                   | 25                      | 0.26                                        | 1e-76         | 0.42            | 2e-222        | 0.50                                           | 5e-24                   |
| PRF1        | perforin 1 (pore forming protein)                       | ABMR-RAT,QCAT        | 6,787                 | 598   | 1,344 | 50                   | 60                      | 0.26                                        | 2e-76         | 0.49            | 7e-300        | 0.55                                           | 1e-30                   |
| GZMB        | granzyme B                                              | ABMR-RAT,QCAT        | 10,203                | 1,634 | 4,546 | 15                   | 19                      | 0.25                                        | 4e-74         | 0.45            | 2e-247        | 0.57                                           | 2e-32                   |
| GBP1        | guanylate binding protein 1, interferon-inducible       | ABMR-RAT,GRIT3       | 742                   | 617   | 529   | 153                  | 6,985                   | 0.24                                        | 7e-68         | 0.44            | 1e-241        | 0.58                                           | 2e-34                   |
| IDO1        | indoleamine 2,3-dioxygenase 1                           | ABMR-RAT,GRIT3       | 38                    | 35    | 31    | 47                   | 9,620                   | 0.24                                        | 3e-66         | 0.48            | 4e-299        | 0.58                                           | 4e-35                   |
| GBP4        | guanylate binding protein 4                             | ABMR-RAT,GRIT1,GRIT3 | 270                   | 130   | 101   | 31                   | 1,721                   | 0.23                                        | 2e-63         | 0.49            | 7e-301        | 0.54                                           | 8e-29                   |
| RARRES3     | retinoic acid receptor responder (tazarotene induced) 3 | GRIT3,TCMR-RAT       | 3,162                 | 1,403 | 1,427 | 44                   | 3,157                   | 0.23                                        | 3e-63         | 0.34            | 4e-136        | 0.50                                           | 2e-24                   |
| GZMH        | granzyme H                                              | RAT                  | 7,166                 | 90    | 1,351 | 27                   | 24                      | 0.23                                        | 2e-62         | 0.34            | 5e-135        | 0.39                                           | 2e-14                   |
| average     |                                                         |                      |                       |       |       |                      |                         | 0.28                                        |               | 0.46            |               | 0.54                                           |                         |

<sup>1</sup> Cohort of 5086 kidney allograft biopsies. Halloran, P.F., *et al.* Subthreshold rejection activity in many kidney transplants currently classified as having no rejection. *Am J Transplant in press*, (2024).  
<sup>2</sup> Cohort of 604 kidney allograft biopsies and paired blood samples for donor-derived cell-free DNA (dd-cfDNA) testing. Gauthier et al. Distinct Molecular Processes Mediate Donor-derived Cell-free DNA Release From Kidney Transplants in Different Disease States. *Transplantation* **108**, 898-910 (2023).  
Abbreviations: pathogenesis-based transcript set (PBT); natural killer (NK); antibody-mediated rejection (ABMR); early ABMR (EABMR); human umbilical vein endothelial cell (HUVEC); interferon gamma (IFNg); spearman correlation coefficient (SCC).

**Supplementary Table 15. IFNG-inducible ABMR activity genes**

| Gene symbol | Gene                                              | PBT annotation         | Cell panel expression |     |     |                      |                         | Correlation with ABMR in K5086 <sup>1</sup> |               |                 |               | Correlation with dd-cfDNA in N604 <sup>2</sup> |                         |
|-------------|---------------------------------------------------|------------------------|-----------------------|-----|-----|----------------------|-------------------------|---------------------------------------------|---------------|-----------------|---------------|------------------------------------------------|-------------------------|
|             |                                                   |                        | NK                    | CD4 | CD8 | HUVEC (unstimulated) | HUVEC (IFNg stimulated) | SCC EABMR K5086                             | p EABMR K5086 | SCC FABMR K5086 | p FABMR K5086 | SCC dd-cfDNA (cp/mL) N604                      | p dd-cfDNA (cp/mL) N604 |
| CXCL9       | chemokine (C-X-C motif) ligand 9                  | ABMR-RAT,GRIT1         | 27                    | 18  | 23  | 41                   | 11,888                  | 0.29                                        | 5e-97         | 0.47            | 3e-275        | 0.58                                           | 8e-34                   |
| WARS        | tryptophanyl-tRNA synthetase                      | ABMR-RAT,GRIT3,        | 344                   | 337 | 302 | 910                  | 10,642                  | 0.26                                        | 2e-78         | 0.49            | 0e+00         | 0.62                                           | 4e-41                   |
| CXCL10      | chemokine (C-X-C motif) ligand 10                 | ABMR-RAT,GRIT1         | 20                    | 21  | 18  | 32                   | 9,860                   | 0.29                                        | 4e-98         | 0.45            | 3e-251        | 0.58                                           | 2e-34                   |
| IDO1        | indoleamine 2,3-dioxygenase 1                     | ABMR-RAT,GRIT3,        | 38                    | 35  | 31  | 47                   | 9,620                   | 0.24                                        | 3e-66         | 0.48            | 4e-299        | 0.58                                           | 4e-35                   |
| GBP1        | guanylate binding protein 1, interferon-inducible | ABMR-RAT,GRIT3,        | 667                   | 752 | 598 | 127                  | 8,616                   | 0.24                                        | 7e-68         | 0.44            | 1e-241        | 0.58                                           | 2e-34                   |
| CXCL11      | chemokine (C-X-C motif) ligand 11                 | ABMR-RAT,GRIT3,        | 9                     | 6   | 6   | 12                   | 7,317                   | 0.31                                        | 4e-112        | 0.48            | 9e-290        | 0.58                                           | 5e-35                   |
| IL18BP      | interleukin 18 binding protein                    | GRIT1,TCMR-RAT         | 168                   | 70  | 67  | 70                   | 3,270                   | 0.22                                        | 1e-55         | 0.41            | 6e-200        | 0.50                                           | 8e-25                   |
| GBP4        | guanylate binding protein 4                       | ABMR-RAT,GRIT3,        | 270                   | 130 | 101 | 31                   | 1,721                   | 0.23                                        | 2e-63         | 0.49            | 7e-301        | 0.54                                           | 8e-29                   |
| PLA1A       | phospholipase A1 member A                         | ABMR-RAT, DSAST,GRIT3, | 18                    | 13  | 15  | 17                   | 545                     | 0.29                                        | 1e-100        | 0.63            | 0e+00         | 0.58                                           | 2e-34                   |
| CX3CL1      | chemokine (C-X3-C motif) ligand 1                 | ABMR-RAT,IRITD3        | 24                    | 27  | 22  | 22                   | 183                     | 0.23                                        | 9e-61         | 0.49            | 0e+00         | 0.44                                           | 2e-18                   |
|             |                                                   |                        |                       |     |     |                      | average                 | 0.26                                        |               | 0.48            |               | 0.56                                           |                         |

<sup>1</sup> Cohort of 5086 kidney allograft biopsies. Halloran, P.F., *et al.* Subthreshold rejection activity in many kidney transplants currently classified as having no rejection. *Am J Transplant in press*, (2024).

<sup>2</sup> Cohort of 604 kidney allograft biopsies and paired blood samples for donor-derived cell-free DNA (dd-cfDNA) testing. Gauthier et al. Distinct Molecular Processes Mediate Donor-derived Cell-free DNA Release From Kidney Transplants in Different Disease States. *Transplantation* **108**, 898-910 (2023).

Abbreviations: pathogenesis-based transcript set (PBT); natural killer (NK); antibody-mediated rejection (ABMR); early ABMR (EABMR); human umbilical vein endothelial cell (HUVEC); interferon gamma (IFNg); spearman correlation coefficient (SCC).

**Supplementary Table 16. Definition of NK cell-expressed ABMR activity genes**

| Gene symbol | Gene                                                                            | PBT annotation      | Cell panel expression |       |       |                      |                                 | Correlation with ABMR in K5086 <sup>1</sup> |               |                 |               | Correlation with dd-cfDNA in N604 <sup>2</sup> |                         |
|-------------|---------------------------------------------------------------------------------|---------------------|-----------------------|-------|-------|----------------------|---------------------------------|---------------------------------------------|---------------|-----------------|---------------|------------------------------------------------|-------------------------|
|             |                                                                                 |                     | NK                    | CD4   | CD8   | HUVEC (unstimulated) | HUVEC (IFN $\gamma$ stimulated) | SCC EABMR K5086                             | p EABMR K5086 | SCC FABMR K5086 | p FABMR K5086 | SCC dd-cfDNA (cp/mL) N604                      | p dd-cfDNA (cp/mL) N604 |
| PRF1        | perforin 1 (pore forming protein)                                               | ABMR-RAT,QCAT       | 16,872                | 2,596 | 4,955 | 50                   | 56                              | 0.26                                        | 2e-76         | 0.49            | 7e-300        | 0.55                                           | 1e-30                   |
| GNLY        | granulysin                                                                      | ABMR-RAT,DSAST,QCAT | 11,561                | 5,121 | 8,299 | 35                   | 34                              | 0.38                                        | 7e-175        | 0.46            | 5e-268        | 0.52                                           | 2e-26                   |
| GZMB        | granzyme B                                                                      | ABMR-RAT,QCAT       | 10,203                | 1,634 | 4,546 | 15                   | 19                              | 0.25                                        | 4e-74         | 0.45            | 2e-247        | 0.57                                           | 2e-32                   |
| TRDC        | T cell receptor delta constant                                                  | ABMR-RAT            | 9,333                 | 214   | 372   | 19                   | 20                              | 0.21                                        | 3e-52         | 0.47            | 2e-280        | 0.48                                           | 2e-22                   |
| NKG7        | natural killer cell granule protein 7                                           | ABMR-RAT,QCAT       | 8,535                 | 369   | 3,138 | 21                   | 25                              | 0.26                                        | 1e-76         | 0.42            | 2e-222        | 0.50                                           | 5e-24                   |
| FGFBP2      | fibroblast growth factor binding protein 2                                      | ABMR-RAT,DSAST      | 7,651                 | 102   | 913   | 11                   | 12                              | 0.46                                        | 1e-259        | 0.48            | 2e-298        | 0.47                                           | 2e-21                   |
| CST7        | cystatin F (leukocystatin)                                                      | ABMR-RAT,QCAT       | 7,421                 | 2,469 | 2,904 | 22                   | 28                              | 0.18                                        | 8e-38         | 0.41            | 1e-203        | 0.49                                           | 3e-23                   |
| KLRF1       | killer cell lectin-like receptor subfamily F, member 1                          | ABMR-RAT,DSAST,NKB  | 7,393                 | 21    | 16    | 8                    | 11                              | 0.22                                        | 2e-54         | 0.49            | 0e+00         | 0.44                                           | 1e-18                   |
| GZMH        | granzyme H                                                                      | RAT                 | 7,166                 | 90    | 1,351 | 27                   | 24                              | 0.23                                        | 2e-62         | 0.34            | 5e-135        | 0.39                                           | 2e-14                   |
| KLRD1       | killer cell lectin-like receptor subfamily D, member 1                          | ABMR-RAT            | 6,493                 | 49    | 754   | 22                   | 36                              | 0.28                                        | 2e-89         | 0.47            | 1e-283        | 0.55                                           | 5e-30                   |
| SH2D1B      | SH2 domain containing 1B                                                        | ABMR-RAT,DSAST,NKB  | 5,392                 | 10    | 13    | 17                   | 16                              | 0.20                                        | 5e-45         | 0.50            | 0e+00         | 0.38                                           | 4e-14                   |
| S1PR5       | sphingosine-1-phosphate receptor 5                                              | ABMR-RAT            | 3,808                 | 22    | 32    | 29                   | 27                              | 0.31                                        | 4e-112        | 0.48            | 4e-299        | 0.50                                           | 1e-24                   |
| XCL1        | chemokine (C motif) ligand 1                                                    | ABMR-RAT            | 3,683                 | 242   | 1,491 | 23                   | 32                              | 0.22                                        | 1e-54         | 0.45            | 3e-249        | 0.49                                           | 2e-23                   |
| CCL4        | chemokine (C-C motif) ligand 4                                                  | ABMR-RAT            | 3,200                 | 266   | 1,977 | 35                   | 30                              | 0.27                                        | 2e-85         | 0.49            | 3e-308        | 0.60                                           | 5e-37                   |
| FGR         | FGR proto-oncogene, Src family tyrosine kinase                                  | cIRIT               | 3,104                 | 33    | 48    | 57                   | 46                              | 0.16                                        | 7e-32         | 0.43            | 8e-228        | 0.49                                           | 1e-23                   |
| CD160       | CD160 molecule                                                                  | ABMR-RAT            | 1,833                 | 14    | 23    | 18                   | 21                              | 0.20                                        | 3e-45         | 0.42            | 1e-213        | 0.37                                           | 1e-13                   |
| TBX21       | T-box 21                                                                        | ABMR-RAT            | 1,803                 | 165   | 408   | 35                   | 41                              | 0.22                                        | 9e-58         | 0.47            | 1e-280        | 0.47                                           | 2e-21                   |
| KIR2DL2     | killer cell immunoglobulin-like receptor, two domains, long cytoplasmic tail, 2 |                     | 1,563                 | 26    | 38    | 40                   | 37                              | 0.19                                        | 1e-43         | 0.32            | 5e-121        | 0.26                                           | 3e-07                   |
| KLRC3       | killer cell lectin-like receptor subfamily C, member 3                          | ABMR-RAT            | 1,317                 | 11    | 273   | 11                   | 11                              | 0.18                                        | 3e-40         | 0.42            | 8e-213        | 0.40                                           | 3e-15                   |
| KIR2DL3     | killer cell immunoglobulin-like receptor, two domains, long cytoplasmic tail, 3 |                     | 1,293                 | 29    | 33    | 48                   | 41                              | 0.19                                        | 4e-41         | 0.25            | 3e-72         | 0.23                                           | 6e-06                   |
| mean        |                                                                                 |                     |                       |       |       |                      |                                 | 0.24                                        |               | 0.44            |               | 0.46                                           |                         |

<sup>1</sup> Cohort of 5086 kidney allograft biopsies. Halloran, P.F., *et al.* Subthreshold rejection activity in many kidney transplants currently classified as having no rejection. *Am J Transplant in press*, (2024).

<sup>2</sup> Cohort of 604 kidney allograft biopsies and paired blood samples for donor-derived cell-free DNA (dd-cfDNA) testing. Gauthier et al. Distinct Molecular Processes Mediate Donor-derived Cell-free DNA Release From Kidney Transplants in Different Disease States. *Transplantation* **108**, 898-910 (2023).

Abbreviations: pathogenesis-based transcript set (PBT); natural killer (NK); antibody-mediated rejection (ABMR); early ABMR (EABMR); human umbilical vein endothelial cell (HUVEC); interferon gamma (IFN $\gamma$ ); spearman correlation coefficient (SCC).

**Supplementary Table 17. ABMR-associated endothelial genes**

| Gene symbol | Gene                                                                  | PBT annotation          | Cell panel expression |     |     |                      |                         | Correlation with ABMR in K5086 <sup>1</sup> |               |                 |               | Correlation with dd-cfDNA in N604 <sup>2</sup> |                         |
|-------------|-----------------------------------------------------------------------|-------------------------|-----------------------|-----|-----|----------------------|-------------------------|---------------------------------------------|---------------|-----------------|---------------|------------------------------------------------|-------------------------|
|             |                                                                       |                         | NK                    | CD4 | CD8 | HUVEC (unstimulated) | HUVEC (IFNg stimulated) | SCC EABMR K5086                             | p EABMR K5086 | SCC FABMR K5086 | p FABMR K5086 | SCC dd-cfDNA (cp/mL) N604                      | p dd-cfDNA (cp/mL) N604 |
| GNG11       | guanine nucleotide binding protein (G protein), gamma 11              | ABMR-RAT,DSAST          | 66                    | 23  | 25  | 5,182                | 4,144                   | -0.01                                       | 4e-01         | 0.45            | 6e-256        | 0.23                                           | 5e-06                   |
| PECAM1      | platelet/endothelial cell adhesion molecule 1                         | ABMR-RAT,ENDAT,IRRAT950 | 344                   | 105 | 350 | 3,178                | 3,034                   | -0.01                                       | 6e-01         | 0.41            | 2e-202        | 0.41                                           | 7e-16                   |
| CDH5        | cadherin 5, type 2 (vascular endothelium)                             | ABMR-RAT,DSAST,ENDAT    | 19                    | 17  | 17  | 2,845                | 2,224                   | 0.14                                        | 2e-24         | 0.46            | 3e-260        | 0.37                                           | 3e-13                   |
| ECSCR       | endothelial cell surface expressed chemotaxis and apoptosis regulator | ABMR-RAT,cIRIT          | 17                    | 40  | 38  | 2,710                | 2,493                   | 0.03                                        | 2e-02         | 0.47            | 2e-272        | 0.37                                           | 2e-13                   |
| ROBO4       | roundabout guidance receptor 4                                        | ABMR-RAT,DSAST          | 27                    | 43  | 41  | 1,694                | 1,486                   | 0.20                                        | 2e-47         | 0.55            | 0e+00         | 0.38                                           | 7e-14                   |
| ERG         | v-ets avian erythroblastosis virus E26 oncogene homolog               |                         | 19                    | 10  | 11  | 1,038                | 995                     | -0.02                                       | 2e-01         | 0.42            | 7e-217        | 0.22                                           | 2e-05                   |
| MALL        | mal, T-cell differentiation protein-like                              | ABMR-RAT,DSAST          | 29                    | 23  | 27  | 802                  | 360                     | 0.11                                        | 5e-15         | 0.46            | 2e-269        | 0.36                                           | 2e-12                   |
| RASIP1      | Ras interacting protein 1                                             | ABMR-RAT,ENDAT          | 43                    | 26  | 38  | 635                  | 446                     | 0.06                                        | 3e-06         | 0.50            | 0e+00         | 0.16                                           | 3e-03                   |
| TEK         | TEK tyrosine kinase, endothelial                                      | ABMR-RAT,DSAST,ENDAT    | 12                    | 10  | 11  | 567                  | 367                     | 0.07                                        | 1e-07         | 0.40            | 7e-197        | 0.09                                           | 7e-02                   |
| MMRN2       | multimerin 2                                                          | ABMR-RAT                | 10                    | 8   | 10  | 539                  | 453                     | 0.04                                        | 1e-02         | 0.43            | 7e-223        | 0.18                                           | 6e-04                   |
| TM4SF18     | transmembrane 4 L six family member 18                                | ABMR-RAT,DSAST          | 15                    | 14  | 16  | 415                  | 389                     | -0.01                                       | 3e-01         | 0.40            | 5e-198        | 0.28                                           | 5e-08                   |
| RAPGEF5     | Rap guanine nucleotide exchange factor 5                              | ABMR-RAT                | 13                    | 17  | 29  | 301                  | 151                     | 0.09                                        | 1e-10         | 0.43            | 1e-229        | 0.30                                           | 8e-09                   |
| NOS3        | nitric oxide synthase 3 (endothelial cell)                            | ENDAT                   | 42                    | 27  | 24  | 209                  | 181                     | 0.08                                        | 8e-09         | 0.42            | 8e-212        | 0.25                                           | 1e-06                   |
| CDH13       | cadherin 13                                                           | ABMR-RAT,DSAST          | 11                    | 9   | 10  | 127                  | 125                     | -0.05                                       | 4e-04         | 0.41            | 7e-206        | 0.30                                           | 5e-09                   |
| average     |                                                                       |                         |                       |     |     |                      |                         | 0.05                                        |               | 0.44            |               | 0.28                                           |                         |

<sup>1</sup> Cohort of 5086 kidney allograft biopsies. Halloran, P.F., *et al.* Subthreshold rejection activity in many kidney transplants currently classified as having no rejection. *Am J Transplant in press*, (2024).  
<sup>2</sup> Cohort of 604 kidney allograft biopsies and paired blood samples for donor-derived cell-free DNA (dd-cfDNA) testing. Gauthier et al. Distinct Molecular Processes Mediate Donor-derived Cell-free DNA Release From Kidney Transplants in Different Disease States. *Transplantation* **108**, 898-910 (2023).  
Abbreviations: pathogenesis-based transcript set (PBT); natural killer (NK); antibody-mediated rejection (ABMR); early ABMR (EABMR); human umbilical vein endothelial cell (HUVEC); interferon gamma (IFNg); spearman correlation coefficient (SCC).

69  
70  
71  
72
